# Supplementary material
Source: publisher figshare collection journal article supplement (https://frontiersin.figshare.com/ndownloader/files/22530497)
Supplement: Supplementary file 1 [file 22530497]

Archive with 3 entries (3 files):
- Supplementary Files.PDF
- Supplementary Table 1.XLSX
- Supplementary Table 3.XLSX
