# Supplementary material
Source: publisher figshare collection journal article supplement (https://frontiersin.figshare.com/ndownloader/files/22530497)
Supplement: Supplementary file 1 [file 22530497 › Supplementary Files.PDF]

## Supplementary Figures

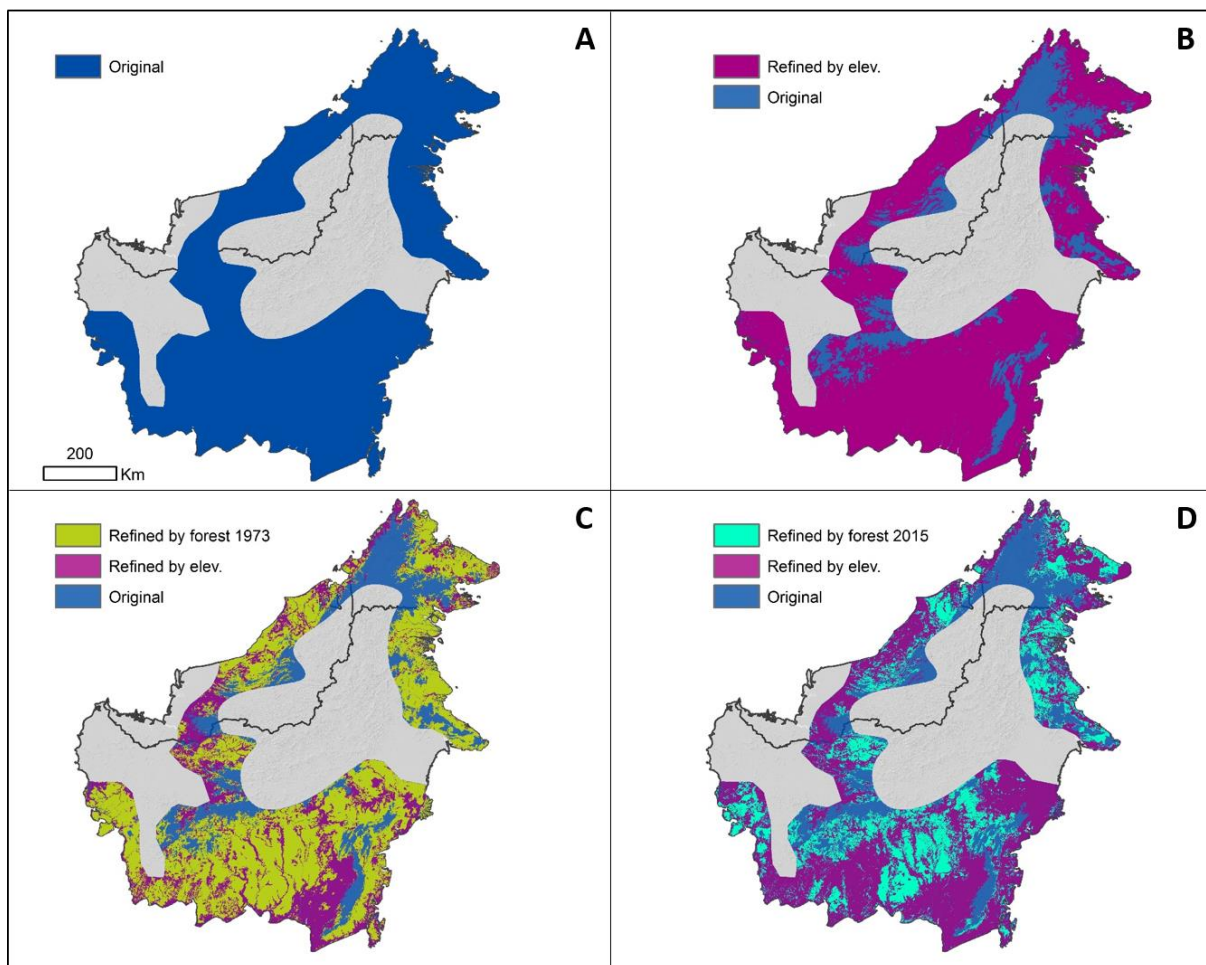

**Supplementary Figure 1.** Range refining example for the Black Hornbill (*Anthracoceros malayanus*), a forest-specialist bird with elevational range 0-200m. A) Unrefined range map as downloaded from BirdLife International and Handbook of the Birds of the World (2016). B) Range refined by elevation using a Digital Elevation Model (Jarvis *et al.*, 2008) and selecting only areas under 200m. C) Range refined by forest using a 1973 forest cover map (Gaveau *et al.*, 2016). D) Range refined by forest using a 2015 forest cover map (Gaveau *et al.*, 2016).

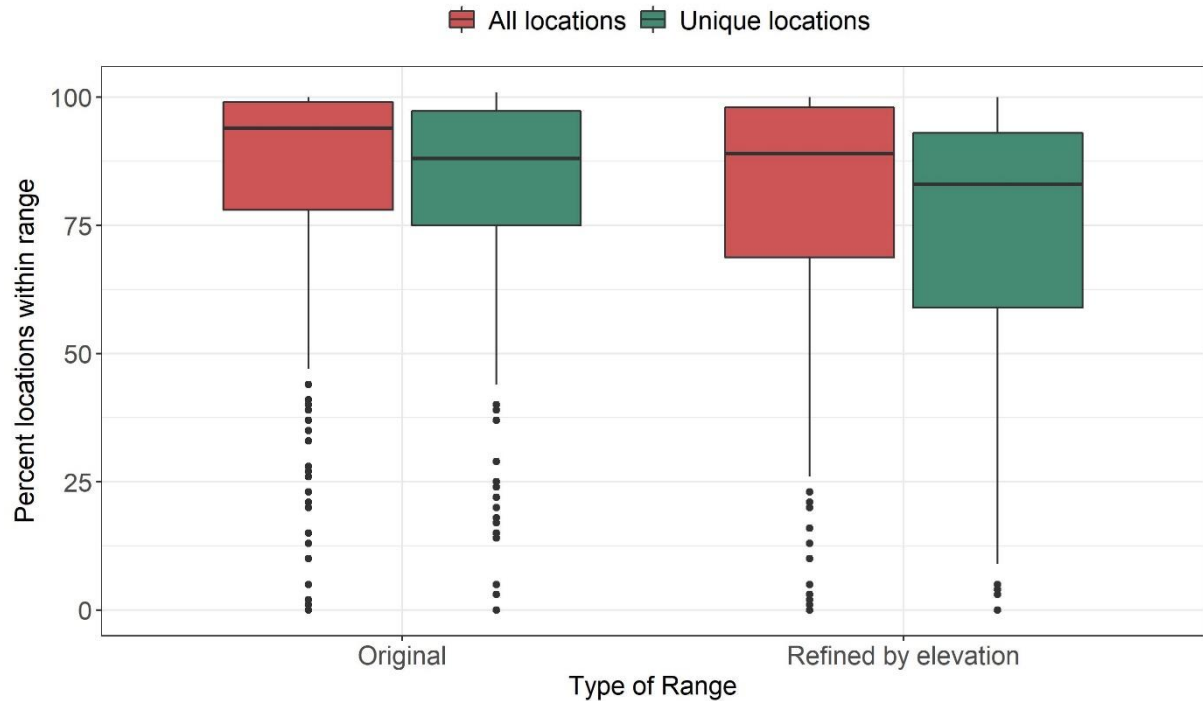

**Supplementary Figure 2.** Boxplot of percent GBIF (Global Biodiversity Information Facility) locations (all and unique) that fall within original range and within the range refined by elevation for 212 forest birds and mammals. 33 species had fewer than 5 sightings in Borneo on the database and were thus excluded.

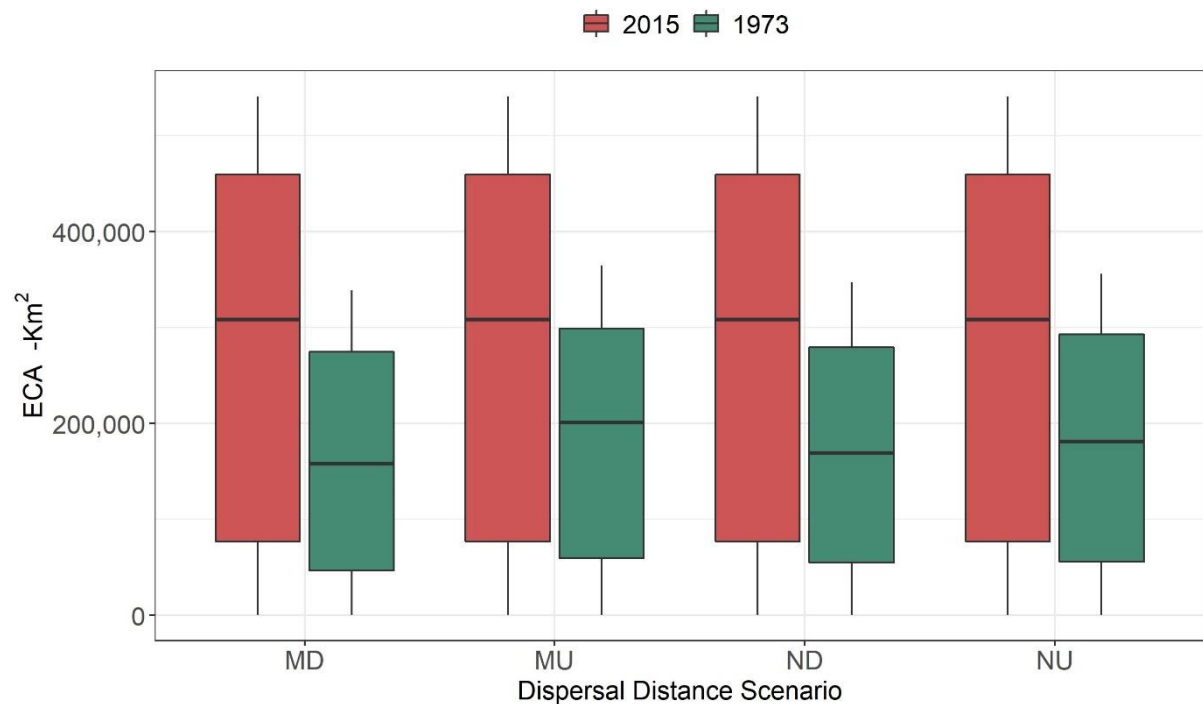

**Supplementary Figure 3.** Comparison of Equal Connected Area (ECA) for different natal dispersal distance scenarios (described in Suppl. Table 5), by year for 245 forest-specialist vertebrates on Borneo. Scenarios MD and MU were constructed by reducing or increasing,

respectively, species' dispersal distance by an order of magnitude. Scenarios ND and NU were constructed by reducing or increasing 50%, respectively, species' dispersal distance. ANOVA testing for differences between scenarios  $p=0.711$ .

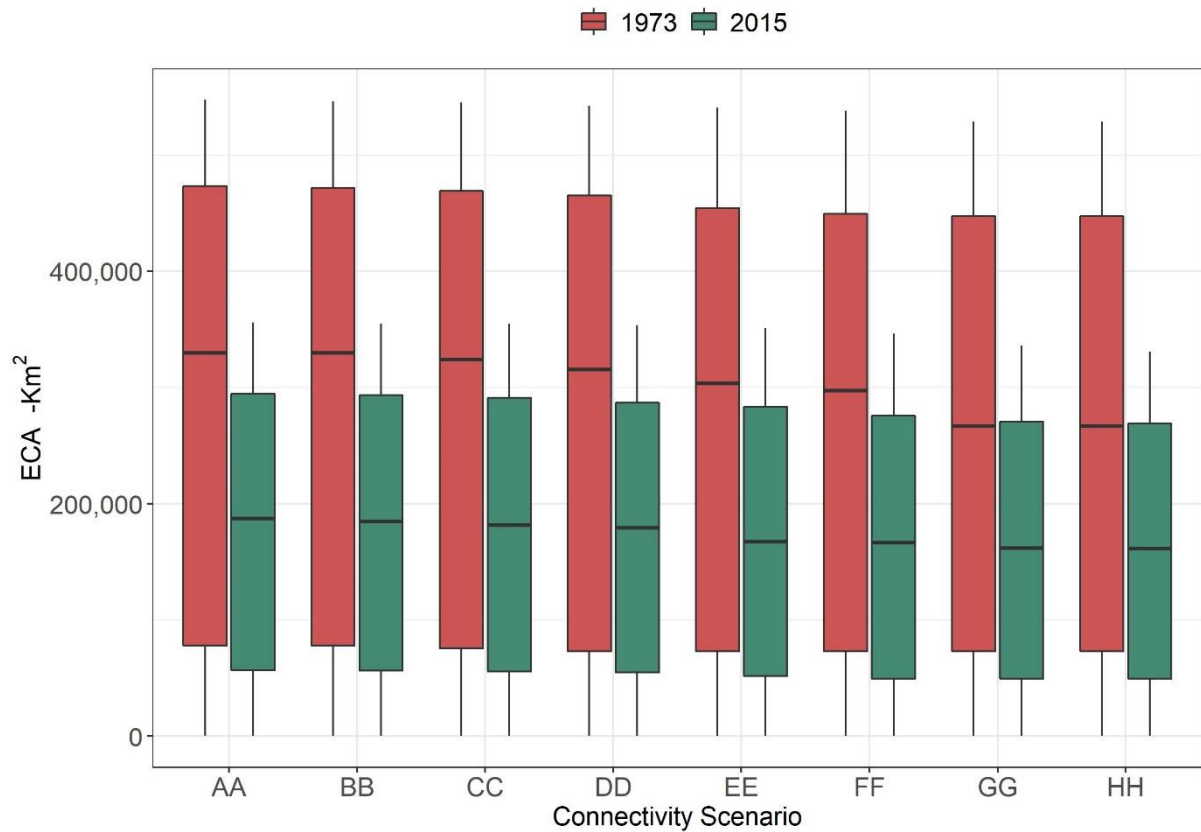

**Supplementary Figure 4.** Comparison of Equal Connected Area (ECA) for different connectivity scenarios (described in Suppl. Table 3), by year for 245 forest-specialists vertebrates on Borneo. Scenarios were constructed from a resistance gradient that ranged from no resistance to movement in open areas and plantations (scenario AA), to full resistance/impermeability to movement in open areas and plantations (scenario HH). ANOVA testing for differences between scenarios  $p>0.1$ .

## Supplementary Tables

**Supplementary Table 1.** Information about forest-specialist birds and mammals of Borneo (N=245) regarding ecological characteristics, habitat preference, and threat. Results from habitat and connectivity modelling, and vulnerability assessment also shown. Provided as Excel file due to size of file.

Attached Excel file

**Supplementary Table 2.** Species excluded from analyses and reasons for exclusion

| Taxon  | Scientific name                     | Reason for exclusion from analyses                            |
|--------|-------------------------------------|---------------------------------------------------------------|
| Bird   | <i>Anhinga melanogaster</i>         | No weight found                                               |
| Bird   | <i>Carpococcyx radiceus</i>         | No weight found                                               |
| Bird   | <i>Chlamydochaera jefferyi</i>      | No weight found                                               |
| Bird   | <i>Dicrurus annectens</i>           | No weight found                                               |
| Bird   | <i>Ducula pickeringii</i>           | No weight found                                               |
| Bird   | <i>Garrulax calvus</i>              | No weight found                                               |
| Bird   | <i>Garrulax palliatus</i>           | No weight found                                               |
| Bird   | <i>Garrulax treacheri</i>           | No weight found                                               |
| Bird   | <i>Halcyon pileata</i>              | No weight found                                               |
| Bird   | <i>Lanius cristatus</i>             | No weight found                                               |
| Bird   | <i>Lanius tigrinus</i>              | No weight found                                               |
| Bird   | <i>Locustella accentor</i>          | No weight found                                               |
| Bird   | <i>Megapodius cumingii</i>          | No weight found                                               |
| Bird   | <i>Muscicapa ferruginea</i>         | No weight found                                               |
| Bird   | <i>Myophonus borneensis</i>         | No weight found                                               |
| Bird   | <i>Oriolus consanguineus</i>        | No weight found                                               |
| Bird   | <i>Oriolus xanthornus</i>           | Artificial patch edge due to forest mapping error             |
| Bird   | <i>Pachycephala homeyeri</i>        | No weight found                                               |
| Bird   | <i>Pericrocotus divaricatus</i>     | No weight found                                               |
| Bird   | <i>Pitta moluccensis</i>            | No weight found                                               |
| Bird   | <i>Pitta nympha</i>                 | No weight found                                               |
| Bird   | <i>Platysmurus aterrimus</i>        | No weight found                                               |
| Bird   | <i>Polyplectron schleiermacheri</i> | No weight found                                               |
| Bird   | <i>Psittacula alexandri</i>         | No weight found                                               |
| Bird   | <i>Ramphiculus jambu</i>            | No weight found                                               |
| Bird   | <i>Rhabdotorrhinus corrugatus</i>   | Discrepancy between altitudinal range and spatial information |
| Bird   | <i>Setornis criniger</i>            | No weight found                                               |
| Bird   | <i>Todiramphus sanctus</i>          | No weight found                                               |
| Bird   | <i>Urosphena whiteheadi</i>         | No weight found                                               |
| Bird   | <i>Vauriella gularis</i>            | No weight found                                               |
| Bird   | <i>Zoothera everetti</i>            | No weight found                                               |
| Mammal | <i>Cynopterus brachyotis</i>        | No weight found                                               |
| Mammal | <i>Cynopterus sphinx</i>            | No weight found                                               |
| Mammal | <i>Hipposideros ater</i>            | No weight found                                               |
| Mammal | <i>Hipposideros cineraceus</i>      | No weight found                                               |
| Mammal | <i>Hylobates muelleri</i>           | No weight found                                               |

|        |                               |                 |
|--------|-------------------------------|-----------------|
| Mammal | <i>Myotis hasseltii</i>       | No weight found |
| Mammal | <i>Tupaia dorsalis</i>        | No weight found |
| Mammal | <i>Tylonycteris robustula</i> | No weight found |

**Supplementary Table 3.** Information about spatial congruence of GBIF (Global Biodiversity Information Facility) sightings with original and range refined by elevation for 212 vertebrates that have 5 or more sightings within Borneo. Provided as Excel file due to size of file.

**Supplementary Table 4.** Description of different dispersal distance scenarios tested for the Equivalent Connected Area analysis.

|    |                                                                                                                                                                           |
|----|---------------------------------------------------------------------------------------------------------------------------------------------------------------------------|
| MD | Dispersal distance reduced by an order of magnitude (e.g. if dispersal distance for main results (scenario DD) is 1 km, then the dispersal distance used here is 0.1 km)  |
| MU | Dispersal distance increased by an order of magnitude (e.g. if dispersal distance for main results (scenario DD) is 1 km, then the dispersal distance used here is 10 km) |
| ND | Dispersal distance reduced by 50% (e.g. if dispersal distance for main results (scenario DD) is 1 km, then the dispersal distance used in scenario ND is 0.5 km)          |
| NU | Dispersal distance increased by 50% (e.g. if dispersal distance for main results (scenario DD) is 1 km, then the dispersal distance used in scenario ND is 1.5 km)        |

**Supplementary Table 5.** Description of different matrix resistance scenarios tested for the Equivalent Connected Area analysis. Shaded in grey is the selected scenario. Dispersion threshold= 100Km, which corresponds to the 0.9 probability for the best disperser

| Scenario | Habitat                                         | Resistance values (sigma value) |            |                |                                |             |       |         |
|----------|-------------------------------------------------|---------------------------------|------------|----------------|--------------------------------|-------------|-------|---------|
|          |                                                 | Stepping stones                 | Open areas | Second. forest | Forest outside elevation range | Plantations | Water | NoData  |
| AA       | Strict forest-specialist                        | 0.01                            | 0.01       | 0.01           | 0.01                           | 0.01        | 0.99  | Exclude |
|          | Able to move through plantations                | 0.01                            | 0.01       | 0.01           | 0.01                           | 0.01        | 0.99  | Exclude |
|          | Able to move through plantations and open areas | 0.01                            | 0.01       | 0.01           | 0.01                           | 0.01        | 0.99  | Exclude |
| BB       | Strict forest-specialist                        | 0.01                            | 0.25       | 0.01           | 0.01                           | 0.25        | 0.99  | Exclude |
|          | Able to move through plantations                | 0.01                            | 0.25       | 0.01           | 0.01                           | 0.01        | 0.99  | Exclude |
|          | Able to move through plantations and open areas | 0.01                            | 0.01       | 0.01           | 0.01                           | 0.01        | 0.99  | Exclude |
| CC       | Strict forest-specialist                        | 0.01                            | 0.5        | 0.01           | 0.01                           | 0.5         | 0.99  | Exclude |
|          | Able to move through plantations                | 0.01                            | 0.5        | 0.01           | 0.01                           | 0.01        | 0.99  | Exclude |

|    |                                                 |      |      |      |      |      |      |         |
|----|-------------------------------------------------|------|------|------|------|------|------|---------|
|    | Able to move through plantations and open areas | 0.01 | 0.01 | 0.01 | 0.01 | 0.01 | 0.99 | Exclude |
| DD | Strict forest-specialist                        | 0.01 | 0.75 | 0.01 | 0.01 | 0.75 | 0.99 | Exclude |
|    | Able to move through plantations                | 0.01 | 0.75 | 0.01 | 0.01 | 0.01 | 0.99 | Exclude |
|    | Able to move through plantations and open areas | 0.01 | 0.25 | 0.01 | 0.01 | 0.01 | 0.99 | Exclude |
| EE | Strict forest-specialist                        | 0.01 | 0.99 | 0.01 | 0.01 | 0.99 | 0.99 | Exclude |
|    | Able to move through plantations                | 0.01 | 0.75 | 0.01 | 0.01 | 0.25 | 0.99 | Exclude |
|    | Able to move through plantations and open areas | 0.01 | 0.5  | 0.01 | 0.01 | 0.25 | 0.99 | Exclude |
| FF | Strict forest-specialist                        | 0.01 | 0.99 | 0.01 | 0.01 | 0.99 | 0.99 | Exclude |
|    | Able to move through plantations                | 0.01 | 0.99 | 0.01 | 0.01 | 0.5  | 0.99 | Exclude |
|    | Able to move through plantations and open areas | 0.01 | 0.75 | 0.01 | 0.01 | 0.5  | 0.99 | Exclude |
| GG | Strict forest-specialist                        | 0.01 | 0.99 | 0.01 | 0.01 | 0.99 | 0.99 | Exclude |
|    | Able to move through plantations                | 0.01 | 0.99 | 0.01 | 0.01 | 0.75 | 0.99 | Exclude |
|    | Able to move through plantations and open areas | 0.01 | 0.99 | 0.01 | 0.01 | 0.75 | 0.99 | Exclude |
| HH | Strict forest-specialist                        | 0.01 | 0.99 | 0.01 | 0.01 | 0.99 | 0.99 | Exclude |
|    | Able to move through plantations                | 0.01 | 0.99 | 0.01 | 0.01 | 0.99 | 0.99 | Exclude |
|    | Able to move through plantations and open areas | 0.01 | 0.99 | 0.01 | 0.01 | 0.99 | 0.99 | Exclude |

**Supplementary Table 6.** Parameter estimates and model metrics for the candidate models.

| Intercept | Max Elev. | Total area | Mean Fractal Index | Max elev. Fractal Index | Mean Fractal Index | df      | log-likelihood | BIC     | delta AIC | weight |
|-----------|-----------|------------|--------------------|-------------------------|--------------------|---------|----------------|---------|-----------|--------|
| 0.341     | -0.033    | -0.139     | NA                 | NA                      | 5                  | 114.411 | -201.316       | 0       | 0.911     |        |
| 0.342     | NA        | -0.143     | NA                 | NA                      | 4                  | 109.335 | -196.666       | 4.651   | 0.089     |        |
| 0.347     | -0.046    | NA         | -0.055             | 0.042                   | 6                  | 53.406  | -73.804        | 127.512 | 0         |        |
| 0.343     | -0.057    | NA         | -0.048             | NA                      | 5                  | 49.347  | -71.187        | 130.129 | 0         |        |
| 0.342     | -0.055    | NA         | NA                 | NA                      | 4                  | 42.443  | -62.88         | 138.436 | 0         |        |
| 0.342     | NA        | NA         | -0.045             | NA                      | 4                  | 40.625  | -59.244        | 142.072 | 0         |        |
| 0.342     | NA        | NA         | NA                 | NA                      | 3                  | 35.075  | -53.646        | 147.67  | 0         |        |

**Supplementary Table 7.** Anova table from linear mixed effects model to evaluate factors affecting changes in relative Equivalent Connected Area for forest-specialist birds and mammals (N=245) from 1973 to 2015 in Borneo.

|                           | <i>Df</i> | <i>Sum Sq</i> | <i>Mean Sq</i> | <i>F value</i> |
|---------------------------|-----------|---------------|----------------|----------------|
| Δ Total area              | 1         | 4.2490        | 4.2490         | 193.94         |
| Maximum elevational range | 1         | 0.5819        | 0.5819         | 26.56          |

## Supplementary methods

### *Calculation of Equivalent Connected Area (ECA)*

To calculate ECA, we followed the approach proposed by (Saura et al 2011) using the following expression:

$$ECA = \sqrt{\sum_{i=1}^n \sum_{j=1}^n a_i a_j p_{ij}^*} \quad , \quad eqn. 1$$

Where  $a_i$  and  $a_j$  are the habitat area in patches  $i$  and  $j$ , and  $p_{ij}^*$  is the maximum product probability of dispersal between  $i$  and  $j$  as defined below.

We calculated the probability  $p$  that the species is able to directly disperse between patches  $i$  and  $j$  ( $p_{ij}$ ) through a negative exponential function, as done in many studies (Moilanen, 2004), of the matrix-adjusted distance  $m_{ij}$ , which accounts for the average dispersal distance  $d$  of the species.

$$p_{ij} = e^{-m_{ij}/d} \quad , \quad eqn. 2$$

The area-weighted average matrix resistance  $m_{ij}$ , was calculated by modifying the Euclidian distance  $E_{ij}$  between two patches:

$$m_{ij} = \frac{E_{ij}}{1 - \sum_{t=1}^{t=c} r_t \sigma_t} \quad , \quad eqn. 3$$

where  $c$  is the number of cover types (matrix components) in the landscape,  $r_k$  is the proportional area of the cover type  $k$  relative to the total area of the matrix, and  $\sigma_k$  is a measure

of the sensitivity of the taxon to the transformed habitat (quantified as the proportional decrease in the number of species [ $0 < \sigma < 1$ ]).

## References

Birdlife International, Handbook of the Birds of the World (2016) Bird species distribution maps of the world. pp Page, <http://datazone.birdlife.org/species/requestdis>.

Gaveau DL, Sheil D, Husnayaen MaS, Arjasakusuma S, Ancrenaz M, Pacheco P, Meijaard E (2016) Rapid conversions and avoided deforestation: examining four decades of industrial plantation expansion in Borneo. Scientific Reports, **6**.

Iucn (2017) The IUCN Red List of Threatened Species. pp Page.

Jarvis A, Reuter H, Nelson A, Guevara E (2008) Hole-filled SRTM for the globe Version 4.

Saura S, Estreguil C, Mouton C, Rodríguez-Freire M (2011) Network analysis to assess landscape connectivity trends: Application to European forests (1990–2000). Ecological Indicators, **11**, 407-416.
