# Supplementary material
Source: publisher figshare collection journal article supplement (https://frontiersin.figshare.com/ndownloader/files/22530497)
Supplement: Supplementary file 1 [file 22530497 › Supplementary Table 1.XLSX]

## Sheet: Mastersheet
	Species characteristics												Habitat availability									Connectivity modelling						Fragmentation			Vulnerability Index
spname	Taxa	Family	Common name	Scientific name	Borneo Endemic	IUCN	Min elev. (m)	Max elev. (m)	Elev. Range (m)	Mean weight (gr)	Habitat	Mean dispersal (km)	Unrefined (km2)	Ref elev (km2)	Ref forest 1973 (km2)	Ref forest 2015 (km2)	Total area of habitat 1973 (km2)	Total area of habitat 2015 (km2)	% Total area loss	Area protected 2015 (km2)	% Area protected	Stepping stones area (km2)	Stepping stones protected (km2)	% Step. Stones protected	ECA 1973 (km2)	ECA 2015 (km2)	relative ΔECA	Mean Fractal Index 1973	Mean Fractal Index 2015	ΔMean Fractal Index	Index ECA
Abrsup	Bird	SCOTOCERCIDAE	Yellow-bellied Warbler	Abroscopus superciliaris		LC	0	2285	2285	6.5	Forest	0.791738	609850	609108	452275	282104	449603	273237	39.2271	27517	10.0707	8867.17	474.678	5.35321	406031	175026	0.568934	1.15518	1.21017	-0.0549843	3
Actcon	Bird	ALCEDINIDAE	Rufous-collared Kingfisher	Actenoides concretus		NT	0	1700	1700	75	Forest	3.69602	552685	551207	463961	352224	462206	345214	25.3117	48578	14.0719	7009.49	427.036	6.09225	424154	309553	0.270187	1.15548	1.21364	-0.058159	2
Aegtip	Bird	AEGITHINIDAE	Common Iora	Aegithina tiphia		LC	0	4096	4096	14.5	Forest, plantations, open areas	1.31253	735428	735329	558444	380337	555535	370902	33.2351	53311	14.3733	9434.47	489.82	5.19182	527825	323306	0.387475	1.15714	1.21003	-0.0528889	2
Aegvir	Bird	AEGITHINIDAE	Green Iora	Aegithina viridissima		NT	0	4096	4096	10.5	Forest	1.07101	609922	609458	463028	309030	460433	300252	34.7894	34226.6	11.3993	8778.6	496.013	5.65025	425704	241196	0.433419	1.15547	1.20987	-0.0544082	3
Aettem	Bird	NECTARINIIDAE	Temminck's Sunbird	Aethopyga temminckii		LC	0	4096	4096	5.35	Forest	0.70034	378982	379996	300737	239355	299641	236191	21.1756	35170.3	14.8906	3164.72	109.594	3.46299	254583	208503	0.181002	1.16189	1.20267	-0.0407754	1
Alcbru	Bird	LEIOTRICHIDAE	Brown Fulvetta	Alcippe brunneicauda		NT	0	1000	1000	15.25	Forest, plantations	1.3549	585890	584576	414045	242421	411221	233278	43.272	25680	11.0083	9142.93	459.988	5.03108	293202	100482	0.657294	1.15766	1.21063	-0.0529712	4
Alofin	Bird	PYCNONOTIDAE	Finsch's Bulbul	Alophoixus finschii		NT	0	4096	4096	23.5	Forest, plantations, open areas	1.77917	471573	471952	381453	281150	379837	274792	27.6553	29477.8	10.7273	6357.77	422.506	6.6455	360308	245911	0.317498	1.15673	1.21575	-0.0590236	2
Alopha	Bird	PYCNONOTIDAE	Yellow-bellied Bulbul	Alophoixus phaeocephalus		LC	0	4096	4096	31.5	Forest, plantations	2.13984	735428	735330	558444	380337	555535	370900	33.2355	53311	14.3734	9436.41	489.811	5.19064	523232	322993	0.382696	1.15714	1.21005	-0.0529108	2
Aloruf	Bird	PYCNONOTIDAE	Chestnut-vented Bulbul	Alophoixus ruficrissus	X	LC	0	2650	2650	44.55	Forest	2.66207	258074	258910	238902	211759	238627	210546	11.7677	30312.5	14.3971	1212.62	22.041	1.81764	227512	201862	0.112741	1.1509	1.2037	-0.0527971	1
Alotep	Bird	PYCNONOTIDAE	Grey-cheeked Bulbul	Alophoixus tephrogenys		LC	0	1150	1150	46.5	Forest, plantations, open areas	2.7349	455837	454691	299643	145396	296960	136956	53.8805	15300.8	11.1721	8439.62	463.763	5.49507	190014	44632.6	0.765109	1.15795	1.21115	-0.0531975	4
Anogal	Bird	BUCEROTIDAE	Bushy-crested Hornbill	Anorrhinus galeritus		NT	0	1800	1800	1190.5	Forest	21.0938	735428	734685	557810	379707	554900	370269	33.2729	53006.5	14.3157	9438.24	490.489	5.19683	538516	339051	0.370398	1.15714	1.21005	-0.0529102	2
Antalb	Bird	BUCEROTIDAE	Oriental Pied Hornbill	Anthracoceros albirostris		LC	0	700	700	737	Forest, plantations, open areas	15.5937	735428	648958	473492	297486	470475	287916	38.8032	32109.1	11.1522	9570.21	504.461	5.27116	458655	264480	0.423357	1.15796	1.21035	-0.052389	3
Antmal	Bird	BUCEROTIDAE	Black Hornbill	Anthracoceros malayanus		VU	0	200	200	1050	Forest	19.4892	450067	356962	247101	123291	244509	115173	52.896	12888.4	11.1904	8117.47	521.026	6.41858	155733	51731.8	0.667817	1.16157	1.21478	-0.0532111	4
Antrho	Bird	NECTARINIIDAE	Red-throated Sunbird	Anthreptes rhodolaemus		NT	0	800	800	11.4	Forest, plantations	1.12797	141789	136729	109345	67979.1	108854	66093.7	39.2822	6237.97	9.43807	1885.4	96.1065	5.0974	61103.8	35957.7	0.411531	1.14163	1.20604	-0.0644103	3
Araaff	Bird	NECTARINIIDAE	Streaky-breasted Spiderhunter	Arachnothera affinis		LC	900	1600	700	29.2	Forest	2.04003	219516	34800.2	34255.2	33162.6	33848.5	32693.1	3.41341	10599.2	32.4202	469.458	96.5673	20.57	18229.3	16968.6	0.0691579	1.12321	1.1421	-0.0188917	1
Arachr	Bird	NECTARINIIDAE	Yellow-eared Spiderhunter	Arachnothera chrysogenys		LC	0	1400	1400	22.75	Forest, plantations	1.74319	639269	637680	469073	297105	466293	287965	38.2438	35125.6	12.1979	9139.9	471.269	5.15617	401871	195680	0.513078	1.15745	1.21074	-0.0532946	3
Arahyp	Bird	NECTARINIIDAE	Purple-naped Spiderhunter	Arachnothera hypogrammica		LC	0	4096	4096	11.5	Forest, plantations	1.13419	707231	707033	531065	353789	528155	344369	34.7977	43072	12.5075	9419.91	487.02	5.17011	489644	287860	0.412103	1.15713	1.21006	-0.0529271	3
Arajul	Bird	NECTARINIIDAE	Whitehead's Spiderhunter	Arachnothera juliae	X	LC	0	4096	4096	22.6	Forest	1.73594	47244.1	47410.9	46184	44081	46174.5	44007.8	4.69249	15271.1	34.7009	73.2033	7.5483	10.3114	23646.9	22795.8	0.035992	1.08539	1.18117	-0.0957821	1
Arbgra	Bird	PHASIANIDAE	Sabah Partridge	Arborophila graydoni	X	LC	0	300	300	270	Forest	8.28333	8802.25	5889.7	5228.3	4269.04	5224.31	4212.54	19.3665	202.923	4.81712	56.4975	3.2202	5.69972	5211.87	4188.2	0.196411	1.1529	1.24408	-0.0911803	1
Arbhyp	Bird	PHASIANIDAE	Bornean Partridge	Arborophila hyperythra	X	LC	600	1800	1200	270	Forest	8.28333	161243	89206.4	87581.7	85561.3	87087.1	85013.2	2.38139	20505.3	24.1201	548.072	37.2861	6.80314	75904.4	74259	0.0216773	1.11133	1.12906	-0.0177241	1
Argarg	Bird	PHASIANIDAE	Great Argus	Argusianus argus		NT	0	1500	1500	2040	Forest	29.6151	735428	730532	553677	375620	550758	366171	33.5151	51519.9	14.0699	9448.91	495.873	5.24794	536377	338119	0.369624	1.15703	1.20984	-0.0528105	2
Bathar	Bird	PODARGIDAE	Dulit Frogmouth	Batrachostomus harterti	X	NT	300	1230	930	100.1	Forest	4.43322	27562.9	23453	23291.1	22570.2	23227.6	22489.4	3.17817	5337.72	23.7344	80.8182	7.2153	8.92782	22366.4	21255.2	0.0496817	1.11873	1.16646	-0.0477272	1
Batjav	Bird	PODARGIDAE	Horsfield's Frogmouth	Batrachostomus javensis		LC	0	2150	2150	46.5	Forest, plantations, open areas	2.7349	733267	733051	557174	379600	554308	370242	33.2065	53168.8	14.3606	9358.35	477.707	5.1046	532931	330715	0.379441	1.15713	1.21003	-0.0528945	2
Batmix	Bird	PODARGIDAE	Bornean Frogmouth	Batrachostomus mixtus	X	NT	0	4096	4096	100.1	Forest	4.43322	86580.1	86886.8	82513.8	77262.4	82454.1	77077.2	6.52109	23741	30.8015	185.198	3.6882	1.99149	57669.5	55071.3	0.0450533	1.12943	1.20442	-0.0749876	1
Batste	Bird	PODARGIDAE	Gould's Frogmouth	Batrachostomus stellatus		NT	0	500	500	47.75	Forest	2.78099	477527	403779	313493	213035	311716	206378	33.7929	19774	9.58143	6656.81	437.99	6.57958	284051	137899	0.514527	1.1577	1.21424	-0.0565372	3
Bercom	Bird	BUCEROTIDAE	White-crowned Hornbill	Berenicornis comatus		EN	0	600	600	1360	Forest, plantations	22.939	581982	537232	398171	239055	395634	230659	41.6988	24037.7	10.4213	8395.81	506.159	6.02871	381512	167630	0.560617	1.15582	1.21112	-0.0552982	3
Blyrub	Bird	PICIDAE	Maroon Woodpecker	Blythipicus rubiginosus		LC	0	2200	2200	78	Forest, plantations	3.78848	734524	734264	557256	379194	554313	369715	33.3021	52931.1	14.3167	9478.99	509.797	5.37817	526410	327663	0.377552	1.15593	1.20914	-0.0532106	2
Braatr	Bird	PYCNONOTIDAE	Black-headed Bulbul	Brachypodius atriceps		LC	0	4096	4096	25	Forest, plantations, open areas	1.8499	727932	727806	551323	373760	548407	364337	33.5646	51890.3	14.2424	9423.35	489.588	5.19548	523323	319851	0.388808	1.15717	1.21006	-0.0528875	2
Bubsum	Bird	STRIGIDAE	Barred Eagle-owl	Bubo sumatranus		LC	0	1600	1600	620	Forest, plantations, open areas	13.9847	706395	704976	529019	351922	526105	342502	34.8985	43968.1	12.8373	9420.16	489.582	5.19717	513204	316774	0.382752	1.15674	1.20964	-0.0529043	2
Bucrhi	Bird	BUCEROTIDAE	Rhinoceros Hornbill	Buceros rhinoceros		VU	0	1400	1400	2500	Forest	33.6626	735428	727304	550470	372446	547537	362978	33.7071	50364.3	13.8753	9468.1	501.346	5.29511	533892	336152	0.370375	1.15705	1.20986	-0.0528101	2
Calocu	Bird	PHASIANIDAE	Ferruginous Partridge	Caloperdix oculeus		NT	0	1200	1200	210.5	Forest, plantations, open areas	7.081	176395	161603	151414	134812	151288	134079	11.3749	19555.1	14.5848	732.8	25.9839	3.54584	151246	133950	0.114357	1.17026	1.20888	-0.0386242	1
Calful	Bird	MEGALAIMIDAE	Bornean Brown Barbet	Caloramphus fuliginosus	X	LC	0	750	750	43.1	Forest, plantations, open areas	2.60715	727593	658213	482483	306151	479477	296578	38.1455	33680	11.3562	9572.78	524.788	5.48209	456604	255726	0.439939	1.15649	1.20927	-0.0527814	3
Calhos	Bird	CALYPTOMENIDAE	Hose's Broadbill	Calyptomena hosii	X	NT	600	1220	620	103.5	Forest	4.5275	185193	63040	61911	59538.5	61150.6	58689.3	4.02493	10537.7	17.9551	849.168	104.375	12.2914	33138.1	29565.7	0.107803	1.12483	1.14632	-0.0214923	1
Calvir	Bird	CALYPTOMENIDAE	Green Broadbill	Calyptomena viridis		NT	0	1700	1700	57.9	Forest, plantations	3.14003	735427	733946	557076	378980	554165	369542	33.3156	52744.3	14.2729	9438.16	490.48	5.19678	525228	325325	0.380602	1.15709	1.20999	-0.0528996	2
Calwhi	Bird	CALYPTOMENIDAE	Whitehead's Broadbill	Calyptomena whiteheadi	X	LC	900	1700	800	156.5	Forest	5.87476	95539.7	38381.5	37888	37015.1	37574.1	36651.4	2.45578	12615.9	34.4215	363.676	78.5538	21.5999	22072	21323	0.0339344	1.12108	1.137	-0.0159137	1
Capcon	Bird	CAPRIMULGIDAE	Bonaparte's Nightjar	Caprimulgus concretus		VU	0	500	500	77.6	Forest	3.77623	605076	566186	395293	226176	392316	216831	44.7305	21628.9	9.97502	9345.33	501.099	5.36203	328937	113423	0.655183	1.15814	1.21054	-0.0523948	4
Cenrec	Bird	CUCULIDAE	Short-toed Coucal	Centropus rectunguis		VU	0	1700	1700	198.5	Forest, plantations, open areas	6.82394	605076	604452	432767	262881	429913	253728	40.9814	24568.1	9.68285	9152.85	484.012	5.2881	412740	221103	0.464304	1.15788	1.21083	-0.0529525	3
Ceyeri	Bird	ALCEDINIDAE	Oriental Dwarf-kingfisher	Ceyx erithaca		LC	0	1300	1300	60.5	Forest, plantations	3.22814	725053	712505	538232	362393	535378	353136	34.0399	47554.5	13.4663	9256.76	484.502	5.23404	510017	311594	0.389052	1.15757	1.21072	-0.0531475	2
Chlemi	Bird	ZOSTEROPIDAE	Mountain Black-eye	Chlorocharis emiliae	X	LC	1550	4200	2650	13.9	Forest	1.27804	207002	3090.76	3067.88	3036.48	2945.43	2908.18	1.26452	1316.15	45.2568	128.301	52.7625	41.1239	622.719	609.358	0.0214559	1.12332	1.12979	-0.00646756	1
Chlcya	Bird	CHLOROPSEIDAE	Lesser Green Leafbird	Chloropsis cyanopogon		NT	0	4096	4096	20.65	Forest	1.64001	624488	623997	450371	277210	447495	267901	40.1331	34365.5	12.8277	9308.81	486.252	5.22357	412108	207365	0.496819	1.15715	1.21008	-0.0529218	3
Chlkin	Bird	CHLOROPSEIDAE	Bornean Leafbird	Chloropsis kinabaluensis	X	LC	550	2200	1650	29.2	Forest	2.04003	57141.6	37761.7	36652.7	34777.5	36486.2	34544.3	5.32221	11435.2	33.1028	233.119	11.5794	4.96716	27824.1	26221.6	0.057594	1.11951	1.14899	-0.0294839	1
Chlmol	Bird	CHLOROPSEIDAE	Blue-winged Leafbird	Chloropsis moluccensis		LC	0	1800	1800	23.75	Forest, plantations, open areas	1.79108	624558	624242	462334	302769	459658	293945	36.0514	31378.1	10.6748	8823.71	468.953	5.31469	434988	253457	0.417324	1.1586	1.21303	-0.0544327	3
Chlson	Bird	CHLOROPSEIDAE	Greater Green Leafbird	Chloropsis sonnerati		VU	0	4096	4096	43.1	Forest	2.60715	686902	686675	512290	337209	509442	327965	35.6226	39397.1	12.0126	9243.74	471.467	5.10039	481499	277417	0.423847	1.15726	1.21013	-0.0528782	3
Chrgut	Bird	PICIDAE	Greater Flameback	Chrysocolaptes guttacristatus		LC	0	1800	1800	181	Forest, plantations, open areas	6.43848	28278.5	28113	21781.4	12085.4	21662.6	11851.5	45.2907	3443.11	29.0522	233.872	11.2392	4.8057	21120.3	8964.46	0.575552	1.12431	1.16784	-0.0435297	3
Chrhum	Bird	PICIDAE	Chequer-throated Yellownape	Chrysophlegma humii		NT	0	1700	1700	101.5	Forest	4.47218	649674	648546	492147	330693	489639	322332	34.1695	36413.3	11.2968	8361.45	353.866	4.23211	464988	279502	0.398905	1.15552	1.20955	-0.0540303	2
Chrmin	Bird	PICIDAE	Banded Woodpecker	Chrysophlegma miniaceum		LC	0	1500	1500	92	Forest, plantations, open areas	4.2037	733271	728383	552527	375001	549651	365630	33.4796	51472.6	14.0778	9371.31	484.043	5.16516	530945	329934	0.378591	1.15703	1.20982	-0.0527892	2
Cisjef	Bird	CORVIDAE	Bornean Green Magpie	Cissa jefferyi	X	LC	0	4096	4096	126.5	Forest	5.13763	78464.8	78741.5	75861.3	71740.2	75826.9	71592.4	5.5844	17527.9	24.483	147.784	11.4705	7.76169	70375.6	67466.7	0.0413339	1.14343	1.2249	-0.0814725	1
Corlar	Bird	CAMPEPHAGIDAE	Sunda Cuckooshrike	Coracina larvata		LC	0	4096	4096	113.1	Forest	4.7877	246198	247005	230626	210121	230407	209272	9.17272	34810.9	16.6343	848.399	24.3315	2.86793	230039	207759	0.0968531	1.1321	1.19175	-0.0596453	1
Corenc	Bird	CORVIDAE	Slender-billed Crow	Corvus enca		LC	0	4096	4096	253.5	Forest, plantations, open areas	7.96071	699237	699009	522568	345492	519662	336088	35.3256	38719.1	11.5205	9403.99	487.426	5.18319	503702	305516	0.393459	1.15714	1.21009	-0.0529546	2
Cormac	Bird	CORVIDAE	Large-billed Crow	Corvus macrorhynchos		LC	0	4096	4096	725	Forest, plantations, open areas	15.4333	64170.4	64237.2	49819.5	24167.2	49480.1	22921.9	53.6745	6117.29	26.6876	1245.29	116.655	9.36775	49251.5	16506.3	0.664857	1.16273	1.21795	-0.0552287	4
Corsum	Bird	EURYLAIMIDAE	Dusky Broadbill	Corydon sumatranus		LC	0	2000	2000	140	Forest, plantations	5.47654	733618	733324	557256	379610	554385	370240	33.216	53143.5	14.3538	9369.24	482.494	5.14976	530681	331839	0.374692	1.15728	1.20999	-0.0527124	2
Cuclep	Bird	CUCULIDAE	Sunda Cuckoo	Cuculus lepidus		LC	950	2750	1800	106	Forest, plantations	4.59609	83958.1	30772.3	30338.6	29457.2	30095.7	29148.3	3.14779	10051	34.4821	308.921	69.7716	22.5856	20583	19600	0.0477579	1.12645	1.14873	-0.022282	1
Cyaruf	Bird	TIMALIIDAE	Rufous-fronted Babbler	Cyanoderma rufifrons		LC	120	2100	1980	10.5	Forest, plantations, open areas	1.07101	375148	242274	229520	208304	228075	206502	9.45848	36752.7	17.7977	1801.6	71.1702	3.95039	218443	196539	0.100273	1.14834	1.19081	-0.0424694	1
Cymmac	Bird	EURYLAIMIDAE	Black-and-red Broadbill	Cymbirhynchus macrorhynchos		LC	0	300	300	63.4	Forest, plantations, open areas	3.32477	735429	526937	356720	189241	353274	178928	49.3515	17471.5	9.76454	10313.6	634.659	6.15361	271300	76176.6	0.719216	1.16286	1.21261	-0.049744	4
Cyoban	Bird	MUSCICAPIDAE	Hill Blue-flycatcher	Cyornis banyumas		LC	0	4096	4096	15.5	Forest, plantations, open areas	1.36885	155461	156009	148528	139749	148431	139422	6.06951	26132.7	18.7436	327.187	9.9261	3.03377	146001	132605	0.0917528	1.1495	1.20132	-0.0518161	1
Cyocae	Bird	MUSCICAPIDAE	Large-billed Blue-flycatcher	Cyornis caerulatus		VU	0	500	500	19.4	Forest	1.57674	603111	564243	394259	225650	391318	216373	44.7066	21597.2	9.98145	9277.33	489.259	5.2737	315147	99617.1	0.683903	1.15818	1.21052	-0.0523373	4
Cyooli	Bird	MUSCICAPIDAE	Fulvous-chested Jungle-flycatcher	Cyornis olivaceus		LC	0	900	900	15.5	Forest, plantations	1.36885	27549	27337.5	18215.9	10627.6	18031.7	10289.3	42.9377	2568.13	24.9593	338.286	18.4338	5.44918	13120.3	4783.99	0.635375	1.14833	1.17636	-0.0280332	4
Cyorfd	Bird	MUSCICAPIDAE	Rufous-tailed Jungle-flycatcher	Cyornis ruficauda		LC	0	4096	4096	18	Forest	1.50407	8730.93	8763.1	8621.48	8367.64	8619.8	8356.18	3.05825	2615.51	31.3003	11.457	1.62	14.1398	5092.45	5030.51	0.0121631	1.0803	1.13585	-0.0555555	1
Cyorfg	Bird	MUSCICAPIDAE	Mangrove Blue-flycatcher	Cyornis rufigastra		LC	0	4096	4096	15.25	Forest, plantations, open areas	1.3549	114468	112640	72383.9	32889.1	71403	30263.7	57.6156	5556.74	18.361	2625.33	265.262	10.104	15043.8	5101.95	0.66086	1.15449	1.20376	-0.0492671	4
Cyosup	Bird	MUSCICAPIDAE	Bornean Blue-flycatcher	Cyornis superbus	X	LC	0	4096	4096	15.5	Forest	1.36885	684152	683869	507978	331350	505073	321949	36.2569	37200.8	11.5548	9400.53	487.927	5.19042	468406	262521	0.439544	1.15699	1.21004	-0.0530486	3
Cyoumb	Bird	MUSCICAPIDAE	Grey-chested Jungle-flycatcher	Cyornis umbratilis		NT	0	1160	1160	17.5	Forest, plantations	1.47761	665328	647558	500060	344512	497446	335672	32.5208	43722.8	13.0254	8839.29	502.772	5.68792	466765	286122	0.387011	1.15518	1.20969	-0.0545115	2
Dencin	Bird	CORVIDAE	Bornean Treepie	Dendrocitta cinerascens	X	LC	0	4096	4096	125	Forest, plantations, open areas	5.09917	168461	169058	161335	149693	161257	149210	7.47021	29672.9	19.8866	482.251	33.3828	6.92229	154443	144020	0.0674877	1.15491	1.21555	-0.0606399	1
Dicmon	Bird	DICAEIDAE	Black-sided Flowerpecker	Dicaeum monticolum	X	LC	0	4096	4096	7.8	Forest, plantations, open areas	0.888107	62975.1	63194.7	60858.7	58429.3	60831	58312.7	4.13985	17191.6	29.4818	116.662	8.1036	6.94619	44012.5	42741	0.0288895	1.11429	1.20804	-0.093757	1
Dicaen	Bird	DICRURIDAE	Bronzed Drongo	Dicrurus aeneus		LC	0	4096	4096	26	Forest, plantations, open areas	1.89618	561346	560645	390604	223048	387797	213999	44.8167	24561.5	11.4774	9049.19	468.417	5.17634	271845	79105.7	0.709004	1.15782	1.21078	-0.0529594	4
Dichot	Bird	DICRURIDAE	Hair-crested Drongo	Dicrurus hottentottus		LC	0	1850	1850	91	Forest, plantations, open areas	4.17486	735429	734878	558002	379896	555092	370458	33.2618	53076.8	14.3273	9437.87	490.541	5.19758	535206	334140	0.37568	1.15714	1.21005	-0.0529113	2
Dicpar	Bird	DICRURIDAE	Greater Racquet-tailed Drongo	Dicrurus paradiseus		LC	0	4096	4096	79.5	Forest, plantations, open areas	3.83422	735428	735330	558444	380337	555535	370901	33.2354	53311.1	14.3734	9436.37	489.796	5.19052	535130	333833	0.376165	1.15713	1.21005	-0.0529131	2
Dinjav	Bird	PICIDAE	Common Flameback	Dinopium javanense		LC	0	1700	1700	78.5	Forest, plantations, open areas	3.80377	210904	209052	140608	63373.5	139332	58953	57.6888	10683.5	18.1221	4420.44	351.726	7.95681	53397.1	13730.3	0.742864	1.15462	1.21022	-0.0556028	4
Dinraf	Bird	PICIDAE	Olive-backed Woodpecker	Dinopium rafflesii		NT	0	1200	1200	80	Forest	3.8494	569542	567974	398459	229561	395634	220439	44.2821	27115.9	12.3009	9121.84	482.714	5.29185	316073	98170.6	0.689405	1.1572	1.21058	-0.0533847	4
Dryjav	Bird	PICIDAE	White-bellied Woodpecker	Dryocopus javensis		LC	0	3600	3600	272	Forest	8.32193	462047	460903	313013	162781	310358	154402	50.2502	18293.2	11.8477	8378.57	474.594	5.66439	212956	69398.5	0.674118	1.15645	1.21122	-0.0547667	4
Ducbad	Bird	COLUMBIDAE	Mountain Imperial-pigeon	Ducula badia		LC	0	2300	2300	316	Forest	9.14637	733267	733086	557209	379635	554344	370277	33.2044	53190.4	14.365	9358.37	477.702	5.10454	534071	332178	0.378027	1.15713	1.21003	-0.0528957	2
Erpzan	Bird	VIREONIDAE	White-bellied Erpornis	Erpornis zantholeuca		LC	180	3300	3120	12.5	Forest, plantations, open areas	1.19536	733795	273925	259943	240692	257144	237501	7.63901	39176.5	16.4953	3190.92	108.099	3.38771	223826	207768	0.0717432	1.13333	1.1701	-0.0367664	1
Eryarq	Bird	PITTIDAE	Blue-banded Pitta	Erythropitta arquata	X	LC	150	1500	1350	54	Forest	3.00507	214194	195568	188352	176458	187791	175506	6.54195	34004.7	19.3752	951.824	42.8652	4.50348	181361	167722	0.0752036	1.1444	1.18376	-0.0393692	1
Erygra	Bird	PITTIDAE	Garnet Pitta	Erythropitta granatina		NT	0	300	300	61.5	Forest, plantations, open areas	3.26165	522373	467039	309993	158178	306960	148894	51.4938	13864.7	9.31179	9283.84	529.333	5.70166	219372	54634.5	0.75095	1.1631	1.21473	-0.0516315	4
Eryuss	Bird	PITTIDAE	Black-crowned Pitta	Erythropitta ussheri	X	NT	0	300	300	59	Forest, plantations, open areas	3.17748	40662.8	34420.3	23446.3	12331.5	23167.5	11823.6	48.9648	2361.85	19.9758	507.902	31.7331	6.24787	20411	6561.97	0.678508	1.14635	1.188	-0.0416542	4
Eryhyp	Bird	ESTRILDIDAE	Tawny-breasted Parrotfinch	Erythrura hyperythra		LC	1000	3000	2000	11.6	Forest, plantations, open areas	1.14039	30002.1	14970.3	14681.1	14225.2	14595	14096.5	3.41567	7991.97	56.6948	128.78	36.6894	28.49	11093.2	10667.9	0.0383388	1.11627	1.15462	-0.038356	1
Erypra	Bird	ESTRILDIDAE	Pin-tailed Parrotfinch	Erythrura prasina		LC	0	4096	4096	14.7	Forest, plantations, open areas	1.3239	733271	733180	557294	379718	554428	370359	33.1997	53263.6	14.3816	9358.88	477.921	5.1066	527893	323447	0.387287	1.15713	1.21002	-0.0528903	2
Eumruf	Bird	MUSCICAPIDAE	Rufous-vented Flycatcher	Eumyias ruficrissa		LC	900	2600	1700	17.5	Forest	1.47761	92559.5	39156.1	38681.5	37730.6	38380.6	37378.6	2.61058	12426.2	33.2442	351.952	76.7106	21.7957	19741.6	18791.3	0.0481369	1.12002	1.13578	-0.0157575	1
Eupmac	Bird	EUPETIDAE	Rail-babbler	Eupetes macrocerus		NT	0	1060	1060	69	Forest	3.50688	609922	601130	454736	300789	452132	292001	35.4169	32542.4	11.1446	8787.85	497.885	5.6656	429091	247106	0.424117	1.15537	1.20962	-0.0542575	3
Eupeut	Bird	PYCNONOTIDAE	Puff-backed Bulbul	Euptilotus eutilotus		NT	0	4096	4096	36.5	Forest, plantations, open areas	2.34796	506478	506813	414396	310897	412741	304405	26.248	35054.9	11.5159	6491.73	425.692	6.55745	392849	275288	0.299252	1.15635	1.21486	-0.0585181	2
Eurhar	Bird	EURYLAIMIDAE	Banded Broadbill	Eurylaimus harterti		LC	0	1050	1050	80	Forest, plantations, open areas	3.8494	733271	700951	525389	348370	522492	338934	35.1313	42739.3	12.6099	9435.75	493.669	5.2319	503426	302547	0.399024	1.15699	1.20978	-0.0527903	2
Euroch	Bird	EURYLAIMIDAE	Black-and-yellow Broadbill	Eurylaimus ochromalus		NT	0	1220	1220	35	Forest, plantations, open areas	2.2867	611146	609824	435432	261142	432515	251766	41.7903	27681.7	10.995	9375.93	491.834	5.2457	356370	130586	0.633566	1.15655	1.20946	-0.0529136	4
Ficdum	Bird	MUSCICAPIDAE	Rufous-chested Flycatcher	Ficedula dumetoria		LC	300	3000	2700	9.5	Forest	1.00557	251548	169391	167283	162140	166203	160852	3.21995	31048.6	19.3026	1288.48	56.3238	4.37135	150391	144313	0.0404147	1.11807	1.1474	-0.0293324	1
Fichyp	Bird	MUSCICAPIDAE	Snowy-browed Flycatcher	Ficedula hyperythra		LC	275	3300	3025	9	Forest, plantations, open areas	0.971893	60513.3	56512.9	54286.8	52063.6	54186.8	51913.8	4.19475	14747.8	28.4083	149.791	11.5992	7.74361	48575.5	46931.6	0.0338422	1.12845	1.16785	-0.039402	1
Ficwes	Bird	MUSCICAPIDAE	Little Pied Flycatcher	Ficedula westermanni		LC	0	4096	4096	7.5	Forest	0.866432	192344	193006	182363	170131	182231	169627	6.9165	30071.5	17.728	503.856	16.0173	3.17894	180420	166781	0.0755958	1.12371	1.19692	-0.0732065	1
Geocit	Bird	TURDIDAE	Orange-headed Thrush	Geokichla citrina		LC	250	2300	2050	57	Forest, plantations, open areas	3.10919	7504.78	6353.36	5292.4	4265.69	5262.89	4209.72	20.0113	1473.22	34.9956	55.9746	1.6875	3.01476	5098.09	3493.1	0.314822	1.17056	1.20777	-0.0372049	2
Geoint	Bird	TURDIDAE	Chestnut-capped Thrush	Geokichla interpres		NT	200	1000	800	57	Forest, plantations, open areas	3.10919	519954	120811	115041	104692	112839	102226	9.40575	12339.5	12.0709	2465.58	87.8067	3.56131	46505.3	41662.5	0.104134	1.13141	1.16738	-0.0359708	1
Gersul	Bird	ACANTHIZIDAE	Golden-bellied Gerygone	Gerygone sulphurea		LC	0	4096	4096	5.8	Forest, plantations, open areas	0.736895	650517	650256	476125	300785	473271	291512	38.4048	35221.5	12.0824	9273.43	463.762	5.00097	441300	196542	0.55463	1.15679	1.21032	-0.0535354	3
Grarel	Bird	STURNIDAE	Common Hill Myna	Gracula religiosa		LC	300	2000	1700	195	Forest, plantations	6.74788	735428	207746	201120	190533	199173	188276	5.47111	35668.7	18.9449	2257.06	126.41	5.60066	176198	164594	0.0658577	1.12046	1.14924	-0.0287765	1
Haesan	Bird	PHASIANIDAE	Crimson-headed Partridge	Haematortyx sanguiniceps	X	LC	1000	1500	500	330	Forest	9.39961	73167.3	22539.8	22251.5	21667	22017.6	21379.4	2.89875	8581.26	40.138	287.632	73.08	25.4075	13015.3	12401.3	0.0471752	1.12413	1.14252	-0.0183944	1
Halcor	Bird	ALCEDINIDAE	Ruddy Kingfisher	Halcyon coromanda		LC	0	1800	1800	76.5	Forest, plantations, open areas	3.74242	735428	734685	557810	379707	554900	370269	33.2728	53006.6	14.3157	9438.21	490.459	5.19652	534353	332988	0.376839	1.15714	1.21005	-0.0529094	2
Hardia	Bird	TROGONIDAE	Diard's Trogon	Harpactes diardii		NT	0	900	900	101	Forest, plantations, open areas	4.45829	599520	591998	419568	247646	416684	238366	42.7946	28337.1	11.8881	9280.31	493.149	5.31393	322683	151652	0.530028	1.15715	1.21026	-0.0531091	3
Harduv	Bird	TROGONIDAE	Scarlet-rumped Trogon	Harpactes duvaucelii		NT	0	1070	1070	38.5	Forest, plantations, open areas	2.42821	650792	644496	469684	294061	466781	284671	39.0141	33711.4	11.8423	9389.98	492.808	5.24824	443695	241050	0.456721	1.15681	1.20975	-0.0529406	3
Harkas	Bird	TROGONIDAE	Red-naped Trogon	Harpactes kasumba		NT	0	1220	1220	72	Forest, plantations, open areas	3.60218	591358	589075	418072	247513	415233	238343	42.6002	31291	13.1285	9169.56	489.703	5.34052	309127	115674	0.625804	1.15737	1.20998	-0.0526094	4
Harore	Bird	TROGONIDAE	Orange-breasted Trogon	Harpactes oreskios		LC	300	1500	1200	53	Forest, plantations, open areas	2.96988	100201	90500.2	88622.4	84302.8	88494.7	84053.5	5.01852	17226.7	20.4949	249.221	6.7194	2.69616	88382.4	83507.1	0.0551614	1.1081	1.14843	-0.0403286	1
Harorr	Bird	TROGONIDAE	Cinnamon-rumped Trogon	Harpactes orrhophaeus		NT	0	1400	1400	53	Forest, plantations, open areas	2.96988	253242	250326	222387	187126	221849	184886	16.6611	22817.9	12.3416	2239.23	81.9324	3.65896	218583	154129	0.294872	1.14416	1.20559	-0.0614324	2
Harwhi	Bird	TROGONIDAE	Whitehead's Trogon	Harpactes whiteheadi	X	NT	900	1500	600	65.1	Forest	3.38066	18606.1	9938.67	9613.8	9285.17	9563.45	9219.41	3.5975	5031.22	54.572	65.763	26.7192	40.6295	7694.27	7414.86	0.036314	1.12392	1.15252	-0.0285982	1
Helsqu	Bird	ZOSTEROPIDAE	Pygmy White-eye	Heleia squamifrons	X	LC	0	4096	4096	6.8	Forest, plantations, open areas	0.814566	82025.7	82312.9	80251.9	76643.9	80215.6	76510.9	4.61845	21217.4	27.7312	132.945	11.6523	8.76473	45350.6	43815	0.0338606	1.07489	1.1642	-0.089306	1
Hemsor	Bird	PICIDAE	Grey-and-buff Woodpecker	Hemicircus sordidus		LC	0	1500	1500	30	Forest, plantations, open areas	2.07507	663385	661245	489825	316028	486944	306726	37.0101	36719.8	11.9715	9301.68	497.774	5.35144	457916	251036	0.451786	1.15569	1.20876	-0.0530731	3
Hemhir	Bird	VANGIDAE	Black-winged Flycatcher-shrike	Hemipus hirundinaceus		LC	0	4096	4096	12	Forest, plantations, open areas	1.16501	665223	664876	489814	313701	486921	304317	37.5017	36475.3	11.986	9383.72	486.959	5.1894	458157	254362	0.444815	1.15709	1.21006	-0.0529701	3
Hempic	Bird	VANGIDAE	Bar-winged Flycatcher-shrike	Hemipus picatus		LC	0	4096	4096	9	Forest, plantations, open areas	0.971893	595382	596244	467558	341816	465596	335291	27.9869	44555.7	13.2887	6525.3	186.323	2.8554	450092	307569	0.316653	1.15347	1.20684	-0.0533709	2
Hemcon	Bird	PYCNONOTIDAE	Green-winged Bulbul	Hemixos connectens	X	LC	880	4096	3216	31.2	Forest, plantations, open areas	2.12698	197526	53712.3	53027.2	51815.3	52399.7	51131.7	2.41994	15529.2	30.3711	683.644	112.747	16.492	28232.5	26628.2	0.0568246	1.12244	1.13562	-0.0131807	1
Hiefug	Bird	CUCULIDAE	Malay Hawk-cuckoo	Hierococcyx fugax		LC	0	1700	1700	69.25	Forest, plantations, open areas	3.51488	730858	729398	553831	377389	550982	368111	33.1899	52693	14.3144	9277.7	476.864	5.1399	533213	331674	0.377971	1.15723	1.21014	-0.0529069	2
Hievag	Bird	CUCULIDAE	Moustached Hawk-cuckoo	Hierococcyx vagans		NT	0	900	900	58.2	Forest, plantations, open areas	3.15027	460945	443428	353915	261278	352247	255015	27.6034	25177	9.87275	6263.23	328.488	5.24471	316352	225647	0.286722	1.15543	1.21375	-0.0583192	2
Hydbau	Bird	PITTIDAE	Blue-headed Pitta	Hydrornis baudii	X	VU	0	1200	1200	66	Forest, plantations, open areas	3.41003	603111	601100	430332	260955	427511	251868	41.085	24507.5	9.73029	9086.2	472.157	5.19642	406111	211842	0.478364	1.15784	1.21068	-0.0528411	3
Hydcae	Bird	PITTIDAE	Giant Pitta	Hydrornis caeruleus		NT	0	1200	1200	202	Forest	6.89949	209496	207566	181895	132379	181401	130135	28.2613	13202.5	10.1453	2244.06	44.5617	1.98576	178724	99658.2	0.442391	1.13651	1.19994	-0.063427	3
Hydsch	Bird	PITTIDAE	Bornean Banded Pitta	Hydrornis schwaneri	X	LC	50	1675	1625	70.75	Forest, plantations, open areas	3.56265	730861	468279	401023	319375	397329	314209	20.9197	41961.1	13.3545	5165.91	159.059	3.07901	384156	298134	0.223925	1.16397	1.20692	-0.0429545	2
Hypazu	Bird	MONARCHIDAE	Black-naped Monarch	Hypothymis azurea		LC	0	4096	4096	11.95	Forest, plantations, open areas	1.16195	735428	735330	558445	380337	555535	370900	33.2355	53311	14.3734	9436.41	489.811	5.19065	526835	321922	0.388951	1.15714	1.21005	-0.0529116	2
Ictmal	Bird	ACCIPITRIDAE	Black Eagle	Ictinaetus malaiensis		LC	300	2700	2400	1300	Forest, plantations, open areas	22.2962	639544	122635	116977	107789	115131	105667	8.22043	16774	15.8745	2122.55	118.935	5.60339	87019	78222.9	0.101083	1.12241	1.15233	-0.0299243	1
Indarc	Bird	INDICATORIDAE	Malay Honeyguide	Indicator archipelagicus		NT	0	700	700	30.75	Forest, plantations, open areas	2.1076	609922	571143	425144	271740	422481	262852	37.7837	28404.3	10.8062	8888.1	502.187	5.65011	401268	217136	0.458875	1.15565	1.20984	-0.0541964	3
Iolcha	Bird	PYCNONOTIDAE	Buff-vented Bulbul	Iole charlottae		NT	0	825	825	24	Forest, plantations, open areas	1.80293	609922	585546	439351	285591	436722	276762	36.6273	30225.8	10.9212	8828.37	499.512	5.65803	413741	233051	0.436722	1.15537	1.20949	-0.0541169	3
Irepue	Bird	IRENIDAE	Asian Fairy-bluebird	Irena puella		LC	0	4096	4096	63.85	Forest	3.33962	735428	735329	558444	380337	555535	370901	33.2354	53311	14.3734	9436.35	489.812	5.19069	527118	322290	0.388581	1.15714	1.21005	-0.0529113	2
Ixomal	Bird	PYCNONOTIDAE	Streaked Bulbul	Ixos malaccensis		NT	0	4096	4096	37.5	Forest	2.38828	571566	571047	448563	302374	446330	294178	34.0897	33286.8	11.3152	8196.08	442.169	5.39488	421183	247144	0.413215	1.15427	1.21066	-0.0563896	3
Kenstr	Bird	PELLORNEIDAE	Striped Wren-babbler	Kenopia striata		NT	0	1000	1000	19.5	Forest	1.58186	39630.8	38517.8	33060.6	22635.9	32959.2	22062.2	33.0619	2176.41	9.86485	573.617	19.6155	3.41962	16526.5	12820.5	0.224246	1.13811	1.22636	-0.0882509	2
Kitmal	Bird	MUSCICAPIDAE	White-rumped Shama	Kittacincla malabarica		LC	0	600	600	36.5	Forest, plantations, open areas	2.34796	735347	626055	451168	276088	448108	266388	40.5528	29004	10.8879	9700.75	513.81	5.2966	425241	214465	0.495662	1.158	1.21104	-0.0530395	3
Lacmel	Bird	ALCEDINIDAE	Black-faced Kingfisher	Lacedo melanops		LC	0	1680	1680	50	Forest	2.86284	626207	624566	498496	358506	496332	350653	29.3512	48313	13.778	7852.85	448.785	5.71493	468876	312486	0.333542	1.15699	1.21326	-0.0562696	2
Lalfim	Bird	CAMPEPHAGIDAE	Lesser Cuckooshrike	Lalage fimbriata		LC	0	4096	4096	29	Forest, plantations, open areas	2.03122	648131	647738	474861	301032	472021	291769	38.1873	33388	11.4433	9263.19	474.128	5.11841	447647	246820	0.448628	1.15729	1.21031	-0.0530115	3
Lalnig	Bird	CAMPEPHAGIDAE	Pied Triller	Lalage nigra		LC	0	4096	4096	25.5	Forest, plantations, open areas	1.87312	608986	608441	435415	262465	432547	253184	41.4667	31701.3	12.521	9280.64	485.803	5.23458	396840	187170	0.528349	1.15743	1.21051	-0.0530722	3
Lopkie	Bird	ACCIPITRIDAE	Rufous-bellied Eagle	Lophotriorchis kienerii		NT	0	2000	2000	766.5	Forest	15.9841	735428	735126	558250	380143	555341	370707	33.247	53176.3	14.3446	9436.4	489.853	5.1911	537302	337000	0.372792	1.15714	1.21005	-0.0529105	2
Lopbul	Bird	PHASIANIDAE	Bulwer's Pheasant	Lophura bulweri	X	VU	150	1500	1350	1358	Forest	22.9178	274949	236581	227756	212375	226921	211099	6.97243	35239.8	16.6935	1275.69	39.6855	3.1109	215472	199933	0.0721161	1.13774	1.17765	-0.0399129	1
Lopign	Bird	PHASIANIDAE	Bornean Crested Fireback	Lophura ignita		NT	0	1000	1000	2500	Forest	33.6626	477668	466671	375289	272858	373635	266379	28.7061	27291.1	10.2452	6479.26	425.767	6.57122	363445	247583	0.318788	1.15623	1.21482	-0.0585869	2
Loppyr	Bird	PHASIANIDAE	Bornean Crestless Fireback	Lophura pyronota	X	VU	0	300	300	1015.5	Forest	19.0833	580015	505037	338467	175924	335206	166187	50.4222	16196.2	9.74572	9736.51	548.248	5.63084	275786	85946.9	0.688357	1.16192	1.2116	-0.0496787	4
Macpti	Bird	TIMALIIDAE	Fluffy-backed Tit-babbler	Macronus ptilosus		NT	0	700	700	26	Forest	1.89618	191045	181027	113430	43984.9	112246	40646.4	63.7881	4366.12	10.7417	3338.49	78.0633	2.33828	31784.4	6825.86	0.785245	1.15629	1.20627	-0.0499839	4
Malsep	Bird	PELLORNEIDAE	Horsfield's Babbler	Malacocincla sepiaria		LC	0	1700	1700	28	Forest, plantations, open areas	1.98681	626822	626133	453369	281995	450530	272825	39.4436	29445	10.7927	9170.14	477	5.20166	419162	162138	0.613185	1.1572	1.21033	-0.053125	4
Malaff	Bird	PELLORNEIDAE	Sooty-capped Babbler	Malacopteron affine		NT	0	700	700	17.5	Forest, plantations, open areas	1.47761	191045	181027	113430	43984.9	112246	40646.4	63.7881	4366.12	10.7417	3338.49	78.0633	2.33828	33856	7206.7	0.787137	1.15629	1.20627	-0.049984	4
Malalb	Bird	PELLORNEIDAE	Grey-breasted Babbler	Malacopteron albogulare		NT	0	915	915	18	Forest	1.50407	408769	402205	294147	195536	292292	189070	35.3146	24308.7	12.857	6466	459.405	7.10494	274142	150951	0.449369	1.16037	1.21634	-0.0559695	3
Malcin	Bird	PELLORNEIDAE	Scaly-crowned Babbler	Malacopteron cinereum		LC	0	4096	4096	17.5	Forest, plantations, open areas	1.47761	697599	697406	522785	347662	519936	338415	34.9122	40827.4	12.0643	9247.66	474.138	5.12711	495953	292789	0.409644	1.15737	1.21025	-0.0528856	3
Malmrs	Bird	PELLORNEIDAE	Moustached Babbler	Malacopteron magnirostre		LC	0	4096	4096	20.5	Forest, plantations, open areas	1.63249	698506	698401	523471	347316	520597	337979	35.0786	44822.1	13.2618	9336.51	478.234	5.12219	490288	288258	0.412064	1.15719	1.2099	-0.0527089	3
Malmnm	Bird	PELLORNEIDAE	Rufous-crowned Babbler	Malacopteron magnum		NT	0	800	800	28	Forest, plantations, open areas	1.98681	475566	449966	359147	257277	357477	250779	29.8476	25318.7	10.096	6497.89	427.235	6.57497	333852	217731	0.347822	1.1559	1.21405	-0.05815	2
Meigra	Bird	PICIDAE	Buff-rumped Woodpecker	Meiglyptes grammithorax		LC	0	1100	1100	40.5	Forest, plantations, open areas	2.50693	727212	701789	526485	350499	523613	341169	34.8432	43868.2	12.8582	9329.44	490.298	5.25538	502899	300964	0.401542	1.15701	1.20977	-0.0527557	3
Meituk	Bird	PICIDAE	Buff-necked Woodpecker	Meiglyptes tukki		NT	0	600	600	53.5	Forest	2.98751	403508	382750	294743	195641	293084	189143	35.4646	19017.8	10.0547	6497.61	426.294	6.56078	209500	99677.4	0.524213	1.15693	1.2156	-0.0586724	3
Melnig	Bird	PHASIANIDAE	Black Partridge	Melanoperdix niger		VU	0	1200	1200	280.5	Forest	8.48484	600553	598530	427884	258433	425041	249322	41.3417	23902	9.58679	9110.71	482.573	5.29677	402017	207297	0.484358	1.15826	1.21143	-0.0531726	3
Miclat	Bird	FALCONIDAE	White-fronted Falconet	Microhierax latifrons	X	NT	0	1200	1200	50	Forest, plantations, open areas	2.86284	60042.4	59490.4	46949.3	30746.2	46735.5	30152.4	35.4828	4841.49	16.0567	593.798	17.0442	2.87037	45548.6	26731.2	0.413128	1.13885	1.18618	-0.0473363	3
Micmel	Bird	PYCNONOTIDAE	Black-and-white Bulbul	Microtarsus melanoleucos		NT	0	1830	1830	28	Forest, plantations, open areas	1.98681	665328	664836	517272	361502	514668	352679	31.4744	49514.1	14.0394	8822.27	498.786	5.65372	495069	312748	0.368274	1.15533	1.20977	-0.0544421	2
Mixbor	Bird	TIMALIIDAE	Bold-striped Tit-babbler	Mixornis bornensis		LC	0	1200	1200	16	Forest, plantations, open areas	1.3965	641236	633885	461293	288008	458447	278836	39.1781	29867.2	10.7114	9171.64	466.509	5.08643	425926	202509	0.524544	1.15717	1.21018	-0.0530159	3
Mulpul	Bird	PICIDAE	Great Slaty Woodpecker	Mulleripicus pulverulentus		VU	0	1100	1100	461.5	Forest, plantations, open areas	11.6111	736213	708889	532098	354297	529133	344750	34.8463	44354.5	12.8657	9547.55	523.703	5.48521	515020	317514	0.383492	1.15579	1.20893	-0.0531417	2
Napepi	Bird	PELLORNEIDAE	Eyebrowed Wren-babbler	Napothera epilepidota		LC	0	4096	4096	19	Forest	1.55618	261217	261961	240013	217626	239658	216590	9.62536	37393.1	17.2645	1035.86	29.9322	2.88959	236077	212027	0.101874	1.14636	1.18751	-0.0411588	1
Nisalb	Bird	ACCIPITRIDAE	Blyth's Hawk-eagle	Nisaetus alboniger		LC	200	2200	2000	830	Forest	16.806	333851	210524	202951	188751	201588	187007	7.23289	35308.3	18.8807	1744.11	86.2776	4.94679	195651	180121	0.079376	1.13632	1.18	-0.0436782	1
Nisnan	Bird	ACCIPITRIDAE	Wallace's Hawk-eagle	Nisaetus nanus		VU	0	500	500	555	Forest	13.0422	605076	566186	395293	226176	392316	216831	44.7305	21628.9	9.97502	9345.33	501.099	5.36203	356301	149905	0.579274	1.15814	1.21054	-0.0523948	3
Nycami	Bird	MEROPIDAE	Red-bearded Bee-eater	Nyctyornis amictus		LC	0	1500	1500	76.5	Forest, plantations, open areas	3.74242	735428	730532	553677	375620	550758	366171	33.5151	51519.9	14.0699	9448.87	495.859	5.24781	530234	328910	0.379689	1.15703	1.20984	-0.0528101	2
Orihos	Bird	ORIOLIDAE	Black Oriole	Oriolus hosii	X	NT	900	2000	1100	50.8	Forest	2.89161	20430.3	9373.73	9301.08	8908.84	9254.98	8837.93	4.50624	2860.38	32.3648	70.9047	9.1017	12.8365	8664.61	8237.22	0.0493259	1.10315	1.15661	-0.0534615	1
Orixtt	Bird	ORIOLIDAE	Dark-throated Oriole	Oriolus xanthonotus		NT	0	1220	1220	39	Forest	2.44803	609922	605927	459511	305526	456913	296743	35.0547	33525.8	11.2979	8782.59	496.15	5.64925	430653	247737	0.424741	1.15541	1.20983	-0.0544129	3
Ortatr	Bird	CISTICOLIDAE	Dark-necked Tailorbird	Orthotomus atrogularis		LC	0	4096	4096	7.5	Forest, plantations, open areas	0.866432	555699	554951	409757	245001	407410	236716	41.8974	32762.2	13.8403	8284.88	437.568	5.28153	349054	146327	0.58079	1.15537	1.21089	-0.0555256	3
Ortser	Bird	CISTICOLIDAE	Rufous-tailed Tailorbird	Orthotomus sericeus		LC	0	4096	4096	7	Forest, plantations, open areas	0.829579	542558	541762	372155	206876	369295	197867	46.4205	21647.7	10.9405	9008.92	475.987	5.28351	272232	56831.6	0.791238	1.15753	1.21046	-0.0529288	4
Otubro	Bird	STRIGIDAE	Rajah Scops-owl	Otus brookii		LC	1200	2400	1200	94.8	Forest	4.28386	9111.83	3953.46	3938.93	3907.1	3903.9	3870.3	0.860601	2344.48	60.5761	36.7974	14.1723	38.5144	2727.1	2687.6	0.0144843	1.11535	1.12546	-0.0101109	1
Oturuf	Bird	STRIGIDAE	Reddish Scops-owl	Otus rufescens		NT	0	600	600	76.5	Forest	3.74242	505401	432400	341299	239877	339572	233233	31.3156	23898.4	10.2466	6643.42	425.369	6.40286	315413	189753	0.398398	1.15838	1.21562	-0.0572376	2
Otuspi	Bird	STRIGIDAE	Mountain Scops-owl	Otus spilocephalus		LC	0	2750	2750	82.5	Forest	3.92475	148740	149217	141387	127247	141305	126730	10.3143	22207	17.523	516.772	24.9606	4.8301	141268	125716	0.110089	1.13652	1.20258	-0.0660533	1
Paccin	Bird	PACHYCEPHALIDAE	Mangrove Whistler	Pachycephala cinerea		LC	0	4096	4096	22	Forest	1.70676	138050	136166	91829.3	39751.6	90807.9	36591.1	59.7049	8244.78	22.5322	3160.42	329.942	10.4398	21888.6	6643.35	0.696493	1.15526	1.20528	-0.0500119	4
Pachyp	Bird	PACHYCEPHALIDAE	Bornean Whistler	Pachycephala hypoxantha	X	LC	0	4096	4096	22	Forest	1.70676	84294.8	84594.3	81998.2	77195.8	81968.1	77021.8	6.03442	21215.7	27.5451	173.981	18.513	10.6408	48921.6	46888.5	0.0415583	1.08077	1.17368	-0.0929048	1
Perfla	Bird	CAMPEPHAGIDAE	Scarlet Minivet	Pericrocotus flammeus		LC	0	4096	4096	21.75	Forest, plantations, open areas	1.69451	735429	735330	558445	380337	555535	370901	33.2355	53311.1	14.3734	9436.41	489.81	5.19064	529783	326085	0.384493	1.15714	1.21005	-0.0529117	2
Perign	Bird	CAMPEPHAGIDAE	Fiery Minivet	Pericrocotus igneus		NT	0	4096	4096	15	Forest, plantations, open areas	1.34086	625274	624648	450857	277572	447949	268215	40.1237	34507.5	12.8656	9357.09	506.074	5.40845	419728	218337	0.479813	1.15596	1.20923	-0.0532739	3
Permon	Bird	CAMPEPHAGIDAE	Grey-throated Minivet	Pericrocotus montanus		LC	0	4096	4096	14.75	Forest, plantations, open areas	1.32674	327065	327839	288095	245933	287469	244005	15.1197	38098.1	15.6137	1927.73	39.3687	2.04223	285540	237341	0.168799	1.14262	1.18883	-0.0462182	1
Phadia	Bird	CUCULIDAE	Black-bellied Malkoha	Phaenicophaeus diardi		NT	0	1200	1200	65.4	Forest	3.39047	668350	663743	488697	312969	485762	303539	37.5127	34329.5	11.3097	9430.11	506.747	5.37371	456795	254111	0.443709	1.15607	1.2092	-0.0531386	3
Phasum	Bird	CUCULIDAE	Chestnut-bellied Malkoha	Phaenicophaeus sumatranus		NT	0	1200	1200	114	Forest	4.81167	668350	663743	488697	312969	485762	303539	37.5127	34329.5	11.3098	9430.11	506.747	5.37371	459578	257945	0.438735	1.15607	1.2092	-0.0531386	3
Phipyr	Bird	VANGIDAE	Rufous-winged Philentoma	Philentoma pyrhoptera		LC	0	1000	1000	19.5	Forest	1.58186	695457	677609	501530	324802	498579	315331	36.7541	35766	11.3424	9471.67	497.789	5.25556	463501	257807	0.443783	1.15674	1.20935	-0.0526134	3
Phivel	Bird	VANGIDAE	Maroon-breasted Philentoma	Philentoma velata		NT	0	1400	1400	27.2	Forest	1.95085	609922	608199	461774	307779	459178	299000	34.8838	33947	11.3535	8778.94	496.033	5.65026	430711	246983	0.426569	1.15547	1.20988	-0.054407	3
Phymon	Bird	PHYLLOSCOPIDAE	Yellow-breasted Warbler	Phylloscopus montis		LC	900	2300	1400	5	Forest	0.671115	172395	47022.4	46430.4	45387.6	45992	44894	2.38748	13503.2	30.078	493.663	91.4382	18.5224	20776.3	19715.7	0.0510486	1.1207	1.13507	-0.0143678	1
Phytri	Bird	PHYLLOSCOPIDAE	Mountain Warbler	Phylloscopus trivirgatus		LC	460	4096	3636	9	Forest	0.971893	81142.7	68605.6	66475.3	63746.7	66303.5	63507.8	4.21655	17034.7	26.8231	238.944	27.5535	11.5314	59191.8	57135.3	0.034743	1.13099	1.16435	-0.0333656	1
Piccan	Bird	PICIDAE	Grey-capped Woodpecker	Picoides canicapillus		LC	0	2800	2800	26.5	Forest, plantations, open areas	1.91907	730861	730742	555168	378713	552320	369437	33.1118	53225.6	14.4072	9276.05	476.296	5.13469	530636	327348	0.383103	1.15727	1.21019	-0.0529149	2
Picmol	Bird	PICIDAE	Sunda Pygmy Woodpecker	Picoides moluccensis		LC	0	2200	2200	16.5	Forest, plantations, open areas	1.42384	194733	192912	126552	56917.9	125282	52597	58.0171	8958.26	17.0319	4320.85	344.625	7.97587	42025.9	11049.2	0.737086	1.1551	1.20919	-0.0540957	4
Picinn	Bird	PICIDAE	Speckled Piculet	Picumnus innominatus		LC	0	3000	3000	11.1	Forest	1.10917	20717.8	20654.4	16366.9	9529.26	16271.8	9372.1	42.4029	3316.76	35.3898	157.161	9.027	5.7438	15415.5	5560.8	0.639272	1.12584	1.148	-0.0221573	4
Picpun	Bird	PICIDAE	Crimson-winged Woodpecker	Picus puniceus		LC	0	1300	1300	81	Forest, plantations, open areas	3.87964	733272	720707	544913	367485	542026	358100	33.9332	48784.6	13.6232	9385.74	487.537	5.19445	522888	321670	0.38482	1.15689	1.20978	-0.052898	2
Pitsor	Bird	PITTIDAE	Western Hooded Pitta	Pitta sordida		LC	0	2000	2000	61.2	Forest, plantations, open areas	3.25162	641790	641358	468052	295077	465204	285846	38.5546	33052.5	11.563	9230.11	470.491	5.09735	444441	234152	0.473154	1.15718	1.21007	-0.0528866	3
Pitgym	Bird	PITYRIASIDAE	Bornean Bristlehead	Pityriasis gymnocephala	X	NT	0	1200	1200	132.5	Forest, plantations, open areas	5.28983	735428	716757	540031	362177	537098	352703	34.3316	46840.2	13.2803	9473.48	496.928	5.24546	518763	318546	0.385951	1.15698	1.2098	-0.0528182	2
Plagal	Bird	PLATYLOPHIDAE	Crested Jay	Platylophus galericulatus		NT	0	1500	1500	96	Forest	4.31794	735428	730532	553677	375620	550758	366171	33.5151	51519.9	14.0699	9448.84	495.858	5.24782	524360	320424	0.388924	1.15703	1.20984	-0.0528106	2
Pommon	Bird	TIMALIIDAE	Chestnut-backed Scimitar-babbler	Pomatorhinus montanus		LC	0	4096	4096	33.1	Forest	2.20769	733271	733180	557294	379718	554428	370359	33.1997	53263.5	14.3816	9358.86	477.921	5.10661	523474	317335	0.39379	1.15713	1.21002	-0.0528904	2
Psadal	Bird	EURYLAIMIDAE	Long-tailed Broadbill	Psarisomus dalhousiae		LC	150	2500	2350	52.8	Forest, plantations, open areas	2.96282	64133.5	64200.3	61556.8	56958.9	61525.1	56813.3	7.6584	14599.8	25.698	145.649	3.969	2.72505	61523.6	56373.7	0.0837061	1.14334	1.19991	-0.0565666	1
Psichr	Bird	MEGALAIMIDAE	Gold-whiskered Barbet	Psilopogon chrysopogon		LC	250	1500	1250	162.5	Forest, plantations	6.01566	675100	177638	170317	159701	168246	157340	6.48229	22928.2	14.5724	2361.79	143.366	6.07025	111523	105880	0.0505994	1.12369	1.15696	-0.0332694	1
Psiduv	Bird	MEGALAIMIDAE	Black-eared Barbet	Psilopogon duvaucelii		LC	0	1200	1200	31.65	Forest, plantations, open areas	2.14625	551483	549080	406932	256048	404579	248275	38.6339	23565.9	9.49185	7772.89	207.953	2.67537	355645	114164	0.678995	1.15387	1.20735	-0.0534825	4
Psiexi	Bird	MEGALAIMIDAE	Bornean Barbet	Psilopogon eximius	X	LC	370	1387	1017	89.2	Forest	4.12264	150726	114682	111983	107287	111487	106630	4.35642	24073.5	22.5766	656.347	79.3323	12.0869	95267.9	85929	0.0980278	1.11368	1.15267	-0.0389806	1
Psihen	Bird	MEGALAIMIDAE	Yellow-crowned Barbet	Psilopogon henricii		NT	200	750	550	74	Forest, plantations	3.6649	403235	97401.7	92618.7	85239.3	90731.4	82956.8	8.5688	9346.35	11.2665	2282.52	81.4941	3.57036	32084.4	28171	0.121972	1.13555	1.1728	-0.037258	1
Psimon	Bird	MEGALAIMIDAE	Mountain Barbet	Psilopogon monticola	X	LC	600	1200	600	88.5	Forest, plantations, open areas	4.10223	53980.3	32201.9	31641.3	30591.1	31433.4	30333.7	3.49847	9770.94	32.2115	257.371	32.3802	12.5811	15420.5	14743.6	0.0438961	1.12116	1.14625	-0.0250945	1
Psimys	Bird	MEGALAIMIDAE	Red-throated Barbet	Psilopogon mystacophanos		NT	0	1060	1060	77.5	Forest, plantations	3.77317	640102	633886	459909	284762	457018	275397	39.7404	30723.2	11.156	9364.8	492.683	5.26101	420515	221750	0.47267	1.15723	1.20982	-0.0525867	3
Psipul	Bird	MEGALAIMIDAE	Golden-naped Barbet	Psilopogon pulcherrimus	X	LC	1000	3100	2100	65.5	Forest	3.39373	5205.15	3393.92	3275	3187.62	3258.79	3168.68	2.76529	1129.52	35.6463	18.9369	3.2598	17.214	1246.12	1229.23	0.0135541	1.10437	1.12327	-0.0189083	1
Psiraf	Bird	MEGALAIMIDAE	Red-crowned Barbet	Psilopogon rafflesii		NT	0	600	600	124.5	Forest, plantations	5.08631	401513	380874	293066	194598	291423	188173	35.4295	18991.1	10.0924	6424.67	414.01	6.44406	215714	114072	0.471189	1.15824	1.21582	-0.0575837	3
Psilon	Bird	PSITTACIDAE	Long-tailed Parakeet	Psittacula longicauda		VU	0	300	300	182	Forest, plantations	6.46087	487629	449727	301539	151915	298573	142839	52.1595	14528.4	10.1712	9076.52	557.056	6.13733	198063	51558.9	0.739684	1.15934	1.21179	-0.0524529	4
Pteaer	Bird	VIREONIDAE	White-browed Shrike-babbler	Pteruthius aeralatus		LC	0	4096	4096	36.5	Forest, plantations, open areas	2.34796	149985	150484	142650	133038	142553	132666	6.93574	25145.2	18.9537	372.239	13.491	3.62428	140362	130059	0.0734031	1.16089	1.20567	-0.0447801	1
Ptileu	Bird	PELLORNEIDAE	Bornean Wren-babbler	Ptilocichla leucogrammica	X	VU	0	900	900	39.5	Forest	2.46775	603111	596305	425592	256201	422761	247098	41.5513	24321.6	9.84288	9102.74	473.051	5.1968	385524	183307	0.524525	1.15797	1.21072	-0.0527532	3
Pycbru	Bird	PYCNONOTIDAE	Red-eyed Bulbul	Pycnonotus brunneus		LC	0	4096	4096	28.5	Forest, plantations, open areas	2.00908	598559	597975	425655	252141	422780	242847	42.5595	26962.5	11.1027	9294.21	487.04	5.24025	354710	102365	0.711412	1.15767	1.21021	-0.0525395	4
Pyccya	Bird	PYCNONOTIDAE	Grey-bellied Bulbul	Pycnonotus cyaniventris		NT	0	4096	4096	21.5	Forest, plantations, open areas	1.68222	505905	506240	414027	310805	412375	304318	26.2034	35038.8	11.5138	6487.01	425.43	6.55818	389176	272330	0.300239	1.15651	1.21502	-0.0585114	2
Pycery	Bird	PYCNONOTIDAE	Spectacled Bulbul	Pycnonotus erythropthalmos		LC	0	4096	4096	19	Forest, plantations, open areas	1.55618	641300	640864	467520	293012	464641	283694	38.9435	30389.9	10.7122	9318.06	489.767	5.2561	428997	179398	0.58182	1.15731	1.21008	-0.0527711	3
Pycleu	Bird	PYCNONOTIDAE	Pale-faced Bulbul	Pycnonotus leucops	X	LC	900	3500	2600	35.5	Forest, plantations, open areas	2.30722	54645.7	31393.5	30969.8	29982.4	30815	29782.3	3.35145	10074.8	33.8281	200.117	41.2353	20.6056	21244.8	20224.2	0.04804	1.12791	1.15673	-0.028814	1
Pycmon	Bird	PYCNONOTIDAE	Bornean Bulbul	Pycnonotus montis	X	LC	0	4096	4096	35.5	Forest, plantations, open areas	2.30722	228475	229286	219114	202945	218954	202240	7.63348	35279.8	17.4445	704.912	22.194	3.14848	218845	201075	0.081199	1.15248	1.19891	-0.0464224	1
Pycsim	Bird	PYCNONOTIDAE	Cream-vented Bulbul	Pycnonotus simplex		LC	0	4096	4096	27.2	Forest, plantations, open areas	1.95085	689112	688849	513711	337329	510813	327947	35.7991	40143.6	12.2409	9382.21	488.56	5.2073	486000	283786	0.416078	1.15688	1.20995	-0.0530708	3
Pycsqu	Bird	PYCNONOTIDAE	Scaly-breasted Bulbul	Pycnonotus squamatus		NT	0	4096	4096	21	Forest, plantations, open areas	1.65746	148061	148584	141162	130627	141051	130166	7.71681	19320.7	14.8431	460.972	17.046	3.69784	134064	123475	0.0789847	1.13271	1.20237	-0.0696595	1
Rhaleu	Bird	APODIDAE	Silver-rumped Spinetail	Rhaphidura leucopygialis		LC	0	1500	1500	15.4	Forest, plantations	1.36328	575411	574520	405102	236069	402242	226884	43.5951	28909.3	12.7419	9184.61	505.241	5.50095	271065	90229.5	0.66713	1.15588	1.20957	-0.0536962	4
Rhivig	Bird	BUCEROTIDAE	Helmeted Hornbill	Rhinoplax vigil		CR	0	1100	1100	2835	Forest	36.438	621648	606375	475190	323526	472844	315408	33.2955	36055.6	11.4314	8117.88	491.001	6.04839	465790	296983	0.36241	1.15413	1.20898	-0.054848	2
Rhialb	Bird	RHIPIDURIDAE	White-throated Fantail	Rhipidura albicollis		LC	0	4096	4096	11.5	Forest, plantations, open areas	1.13419	131026	131485	110530	101730	110092	100884	8.36375	19187	19.0189	845.779	62.7921	7.42417	93785.8	87978.2	0.0619241	1.17253	1.21008	-0.0375444	1
Rhiper	Bird	RHIPIDURIDAE	Spotted Fantail	Rhipidura perlata		LC	0	4096	4096	15	Forest, plantations, open areas	1.34086	731583	731470	554923	377290	552011	367869	33.3583	52367.5	14.2353	9420.09	489.744	5.19893	524528	320332	0.389295	1.15717	1.20997	-0.0528076	2
Rhidul	Bird	PHASIANIDAE	Dulit Partridge	Rhizothera dulitensis	X	VU	0	1500	1500	748.5	Forest	15.7466	1884.89	1821.89	1197.99	1079.34	1185.09	1062.22	10.3683	242.162	22.7978	17.118	2.8944	16.9085	669.236	580.721	0.132263	1.11922	1.15748	-0.0382689	1
Rhilon	Bird	PHASIANIDAE	Long-billed Partridge	Rhizothera longirostris		NT	0	1500	1500	748.5	Forest	15.7466	597852	597057	433868	268504	431199	259734	39.7646	30059.6	11.5732	8769.8	452.087	5.15504	415038	227460	0.451954	1.15806	1.21214	-0.0540781	3
Rhyund	Bird	BUCEROTIDAE	Wreathed Hornbill	Rhyticeros undulatus		VU	0	2560	2560	2505	Forest	33.705	735428	735272	558395	380287	555485	370851	33.2384	53261.4	14.362	9436.37	489.782	5.19036	541763	344015	0.365008	1.15714	1.21005	-0.0529106	2
Rolrou	Bird	PHASIANIDAE	Crested Partridge	Rollulus rouloul		NT	0	1200	1200	262.5	Forest	8.13762	735428	716757	540031	362177	537098	352703	34.3316	46840.2	13.2803	9473.48	496.928	5.24546	515239	313295	0.391942	1.15698	1.2098	-0.0528183	2
Sasabn	Bird	PICIDAE	Rufous Piculet	Sasia abnormis		LC	0	1370	1370	9.6	Forest	1.01222	596086	590842	421982	253765	419215	244757	41.6154	32331.6	13.2097	9008.03	469.522	5.21226	301584	115163	0.61814	1.15774	1.21047	-0.0527297	4
Sitfro	Bird	SITTIDAE	Velvet-fronted Nuthatch	Sitta frontalis		LC	0	4096	4096	12.75	Forest, plantations	1.21037	733270	733179	557293	379718	554428	370359	33.1997	53263.6	14.3816	9358.23	477.922	5.10696	517671	316158	0.389268	1.15713	1.21002	-0.0528906	2
Spikin	Bird	ACCIPITRIDAE	Kinabalu Serpent-eagle	Spilornis kinabaluensis	X	VU	1500	2500	1000	800	Forest	16.4207	36573.2	2166.45	2153.44	2116.33	2109.28	2069.92	1.8656	1006.03	48.6025	46.4013	11.7963	25.4223	1219.28	1175.75	0.0357014	1.13213	1.14555	-0.0134131	1
Staleu	Bird	TIMALIIDAE	White-necked Babbler	Stachyris leucotis		NT	0	4096	4096	27.5	Forest, plantations, open areas	1.96438	35524.3	35551.9	29466.5	18840.5	29379.2	18571.6	36.7865	3686.31	19.8492	268.896	10.8054	4.01844	16053.1	10909.2	0.32043	1.13149	1.18313	-0.0516329	2
Stamac	Bird	TIMALIIDAE	Chestnut-rumped Babbler	Stachyris maculata		NT	0	800	800	29.5	Forest, plantations, open areas	2.05321	363214	354472	282921	193446	281659	188450	33.0928	16382	8.69301	4995.79	184.889	3.70089	205782	126209	0.386686	1.1516	1.21531	-0.063709	2
Stanps	Bird	TIMALIIDAE	Grey-throated Babbler	Stachyris nigriceps		LC	0	4096	4096	14	Forest, plantations, open areas	1.28383	192703	193380	183526	170757	183402	170209	7.19336	32803.5	19.2725	547.864	25.1622	4.59278	166428	153673	0.0766397	1.12891	1.1866	-0.0576916	1
Stanll	Bird	TIMALIIDAE	Black-throated Babbler	Stachyris nigricollis		NT	0	4096	4096	24.5	Forest	1.8265	37530.2	37545.1	27072.7	14401.3	26810.7	13844.7	48.3614	5122.15	36.9972	556.584	49.9707	8.9781	12007.4	5591.84	0.534301	1.15727	1.19952	-0.0422457	3
Stapol	Bird	TIMALIIDAE	Grey-headed Babbler	Stachyris poliocephala		LC	0	4096	4096	27	Forest, plantations	1.9418	248603	248107	200956	140665	200226	137831	31.1624	15460.1	11.2167	2833.77	45.5913	1.60886	188435	116564	0.38141	1.1474	1.20498	-0.0575711	2
Tepvir	Bird	VANGIDAE	Large Woodshrike	Tephrodornis virgatus		LC	0	1850	1850	24.5	Forest, plantations, open areas	1.8265	719271	718945	542642	365477	539726	356052	34.031	48012	13.4846	9425.28	490.895	5.20828	514546	311201	0.395193	1.15707	1.20996	-0.0528919	2
Teraff	Bird	MONARCHIDAE	Oriental Paradise-flycatcher	Terpsiphone affinis		LC	0	4096	4096	18.9	Forest, plantations, open areas	1.55102	725053	724973	550607	374620	547774	365390	33.2955	52027.3	14.2388	9229.86	474.882	5.14506	524525	321014	0.387991	1.15783	1.21096	-0.0531379	2
Todchl	Bird	ALCEDINIDAE	Collared Kingfisher	Todiramphus chloris		LC	0	1500	1500	75.5	Forest, plantations, open areas	3.71153	735428	730532	553677	375620	550758	366171	33.5151	51519.9	14.0699	9448.88	495.873	5.24796	530183	328837	0.379767	1.15703	1.20984	-0.0528102	2
Trecap	Bird	COLUMBIDAE	Large Green-pigeon	Treron capellei		VU	0	1500	1500	455.5	Forest	11.5158	605076	604238	432554	262669	429699	253515	41.0016	24560.7	9.68803	9153.2	483.998	5.28774	408841	215051	0.473998	1.15785	1.2108	-0.0529426	3
Trimal	Bird	PELLORNEIDAE	Short-tailed Babbler	Trichastoma malaccense		NT	0	1000	1000	22.75	Forest, plantations, open areas	1.74319	640963	622172	477760	319888	475198	311139	34.5245	35995.5	11.5689	8749.18	467.138	5.33922	453337	270170	0.404042	1.15513	1.2102	-0.0550698	3
Tripgn	Bird	PELLORNEIDAE	Temminck's Babbler	Trichastoma pyrrogenys		LC	0	1550	1550	25	Forest	1.8499	170285	167290	160760	150058	160667	149638	6.86465	31308.6	20.9229	420.509	17.1666	4.08234	149933	137967	0.079809	1.12293	1.19861	-0.0756737	1
Triros	Bird	PELLORNEIDAE	White-chested Babbler	Trichastoma rostratum		NT	0	500	500	21.75	Forest, plantations, open areas	1.69451	599047	561234	390346	221564	387376	212249	45.2087	23254.6	10.9563	9314.99	483.377	5.18924	350055	119934	0.657385	1.15719	1.20989	-0.0526952	4
Trippu	Bird	MUSCICAPIDAE	Rufous-tailed Shama	Trichixos pyrropygus		NT	0	900	900	43.5	Forest	2.62237	609922	591857	445544	291687	442927	282873	36.1354	31087.2	10.9898	8813.67	499.586	5.6683	416307	233801	0.438393	1.15517	1.20953	-0.054359	3
Tricri	Bird	PYCNONOTIDAE	Hairy-backed Bulbul	Tricholestes criniger		LC	0	4096	4096	16.5	Forest	1.42384	645606	645194	472062	298920	469189	289615	38.2733	34245.9	11.8246	9304.62	486.558	5.22921	388295	142993	0.631741	1.15726	1.21002	-0.0527587	4
Turatr	Bird	PELLORNEIDAE	Black-throated Wren-babbler	Turdinus atrigularis	X	NT	0	1500	1500	66.25	Forest	3.41816	77395	76160.9	71225.3	58316.3	71168.5	57792.1	18.7954	7624.47	13.1929	524.17	17.7138	3.3794	69278.8	53160.1	0.232664	1.11966	1.21351	-0.0938482	2
Turcra	Bird	PELLORNEIDAE	Mountain Wren-babbler	Turdinus crassus	X	LC	0	4096	4096	66.3	Forest	3.41979	35001.3	35123.9	33693.8	31509.9	33679.7	31436.2	6.66129	13681.3	43.521	73.7838	4.1706	5.65246	29606.5	27921.2	0.0569233	1.13605	1.21082	-0.0747715	1
Turpol	Bird	TURDIDAE	Island Thrush	Turdus poliocephalus		LC	0	4250	4250	69.3	Forest, plantations, open areas	3.51648	9538.82	9572.04	8601.31	7579.78	8595.87	7550.4	12.1624	2594.12	34.3574	29.3724	0.5562	1.89361	8132.73	7038.44	0.134554	1.14235	1.19963	-0.057279	1
Yuheve	Bird	ZOSTEROPIDAE	Chestnut-crested Yuhina	Yuhina everetti	X	LC	0	4096	4096	13.2	Forest	1.23711	183844	184490	174831	160067	174693	159403	8.75253	32946.4	20.6686	663.62	26.8929	4.05245	145421	134592	0.0744665	1.14773	1.20723	-0.0595061	1
Zosatr	Bird	ZOSTEROPIDAE	Black-capped White-eye	Zosterops atricapilla		LC	1500	3000	1500	9.75	Forest, plantations, open areas	1.02216	46289.7	3167.16	3153.87	3136.51	3038.88	3021.35	0.576805	1329.93	44.0176	115.159	57.2715	49.7327	649.543	646.149	0.00522521	1.12105	1.12542	-0.00436301	1
Zoseve	Bird	ZOSTEROPIDAE	Everett's White-eye	Zosterops everetti		LC	0	4096	4096	9.9	Forest, plantations, open areas	1.03204	148048	148571	143189	135900	143120	135585	5.26436	24880.6	18.3505	314.826	25.3431	8.04987	131691	127012	0.0355301	1.13507	1.1936	-0.0585323	1
Zosfla	Bird	ZOSTEROPIDAE	Javan White-eye	Zosterops flavus		VU	0	4096	4096	9.3	Forest, plantations, open areas	0.992179	14709.8	14575.2	9294.73	5902.79	9141.66	5542.51	39.3709	1135.52	20.4875	360.279	124.153	34.4603	2906.01	1739.42	0.40144	1.14976	1.20096	-0.0511958	3
Arcbin	Mammal	VIVERRIDAE	Binturong	Arctictis binturong		VU	0	3000	3000	13000	Forest, plantations, open areas	16.4114	729561	729403	553979	377586	551134	368299	33.1743	52633.7	14.291	9286.63	476.574	5.13183	542280	346128	0.361717	1.15702	1.21034	-0.0533184	2
Arctri	Mammal	VIVERRIDAE	Small-toothed Palm Civet	Arctogalidia trivirgata		LC	0	2100	2100	2323.79	Forest	5.17794	730855	730580	554972	378542	552125	369254	33.1214	53148.5	14.3935	9287.79	476.675	5.13228	530097	325996	0.385026	1.15694	1.21028	-0.0533422	2
Catbad	Mammal	FELIDAE	Borneo Bay Cat	Catopuma badia	X	EN	0	800	800	3429.52	Forest	6.72065	268727	222854	210621	194369	210394	193319	8.11573	20269.8	10.4852	1049.59	27.4662	2.61685	204118	186644	0.0856073	1.14562	1.20042	-0.0547965	1
Cromon	Mammal	SORICIDAE	Sunda Shrew	Crocidura monticola		LC	0	2000	2000	6.6	Forest	0.101835	730855	730521	554914	378484	552065	369198	33.1242	53119.2	14.3877	9285.79	476.919	5.13601	496155	287905	0.419728	1.15703	1.21029	-0.0532668	3
Dicsum	Mammal	RHINOCEROTIDAE	Sumatran Rhinoceros	Dicerorhinus sumatrensis		CR	0	2500	2500	1.04616e+06	Forest	310.409	1732.38	1738.77	1643.43	1549.34	1642.93	1546.56	5.86527	1210.48	78.269	2.7801	0.0018	0.0647459	1217.18	1132.95	0.0692009	1.08136	1.07725	0.00410885	1
Diphos	Mammal	VIVERRIDAE	Hose's Civet	Diplogale hosei	X	VU	325	1700	1375	1450	Forest	3.77504	100967	90123	87946.5	84836.8	87754.1	84549.9	3.65127	19298.6	22.8251	286.848	12.5253	4.36653	80321.8	77721.3	0.032376	1.12028	1.16237	-0.042099	1
Helmal	Mammal	URSIDAE	Sun Bear	Helarctos malayanus		VU	1	3000	2999	57075.8	Forest, plantations, open areas	44.2209	725615	725895	551326	375967	548458	366733	33.1338	52620.2	14.3484	9234.22	475.246	5.14657	542078	353670	0.347566	1.15672	1.21069	-0.0539621	2
Hemder	Mammal	VIVERRIDAE	Banded Civet	Hemigalus derbyanus		NT	0	1660	1660	1262.7	Forest	3.44093	730855	728898	553298	376885	550450	367594	33.2193	52527.5	14.2895	9290.21	477.969	5.14487	525362	319899	0.391088	1.1569	1.21023	-0.0533336	2
Herbra	Mammal	HERPESTIDAE	Short-tailed Mongoose	Herpestes brachyurus		NT	0	1500	1500	1396.16	Forest	3.68054	730855	725926	550341	373961	547486	364663	33.3931	51458.7	14.1113	9298.33	481.387	5.17714	523015	317843	0.392287	1.15678	1.21002	-0.053236	2
Hersem	Mammal	HERPESTIDAE	Collared Mongoose	Herpestes semitorquatus		NT	0	1400	1400	1523.85	Forest	3.90281	730855	722698	547134	370789	544263	361470	33.5855	50300.5	13.9156	9319.33	488.608	5.24295	520257	315401	0.393759	1.15686	1.21012	-0.0532611	2
Hylalb	Mammal	HYLOBATIDAE	Bornean White-bearded Gibbon	Hylobates albibarbis	X	EN	0	1200	1200	5820	Forest	9.57862	199952	199821	149145	96343.6	148190	92919.1	37.2971	10473.1	11.2712	3424.45	259.674	7.58295	146725	78771.3	0.463136	1.15586	1.21882	-0.0629583	3
Leodiw	Mammal	MURIDAE	Diwangkara's Long-tailed Giant Rat	Leopoldamys diwangkarai		DD	400	1400	1000	185	Forest	0.950188	91454.6	2335.94	2283.19	2227.75	2168.77	2118.56	2.31543	143.868	6.79083	109.188	4.0815	3.73805	728.349	703.653	0.0339068	1.10226	1.12407	-0.0218066	1
Musnud	Mammal	MUSTELIDAE	Malay Weasel	Mustela nudipes		LC	0	1700	1700	569.42	Forest, plantations, open areas	2.01811	730855	729342	553740	377321	550890	368033	33.1929	52685.7	14.3155	9287.95	477.58	5.14193	529528	326350	0.383696	1.15698	1.21023	-0.0532544	2
Naslar	Mammal	CERCOPITHECIDAE	Proboscis Monkey	Nasalis larvatus	X	EN	0	350	350	12265.6	Forest	15.7844	537249	456385	317465	172671	314789	164392	47.7771	16349.8	9.94563	8279.28	463.058	5.59298	284425	99157.9	0.651374	1.15782	1.21093	-0.0531123	4
Neodia	Mammal	FELIDAE	Sunda Clouded Leopard	Neofelis diardi		VU	0	1500	1500	14945	Forest	18.0185	436291	433463	390526	314231	389752	310544	20.3227	41218.4	13.273	3687.42	52.7823	1.43142	372590	294587	0.209353	1.13316	1.21104	-0.0778809	2
Parmar	Mammal	FELIDAE	Marbled Cat	Pardofelis marmorata		NT	0	2500	2500	2826.68	Forest	5.90419	334922	336032	313912	275031	313553	272864	12.9768	43963.5	16.1119	2167.12	107.656	4.96771	304815	260162	0.146492	1.14219	1.21126	-0.0690719	1
Petset	Mammal	SCIURIDAE	Temminck's Flying Squirrel	Petinomys setosus		VU	0	4096	4096	43.85	Forest	0.36218	205621	205564	156793	115013	156097	112998	27.6103	23706.4	20.9794	2015.17	50.3514	2.49861	139556	98175.5	0.296515	1.14725	1.19693	-0.0496812	2
Ponpyg	Mammal	HOMINIDAE	Bornean Orangutan	Pongo pygmaeus	X	CR	0	500	500	53408.3	Forest	42.2963	226666	207757	169299	108870	168347	105438	37.3684	16210.2	15.3741	3431.96	290.465	8.46354	93366.2	56717.8	0.392523	1.15033	1.21231	-0.0619729	2
Prechr	Mammal	CERCOPITHECIDAE	Bornean Banded Langur	Presbytis chrysomelas	X	CR	0	4096	4096	6630	Forest	10.4525	39800.1	39821.3	30391.8	18258.5	30156.8	17532.9	41.8608	7329.13	41.8021	725.623	64.0233	8.82322	15391	11415.8	0.258281	1.14874	1.2103	-0.0615654	2
Prefro	Mammal	CERCOPITHECIDAE	White-fronted Langur	Presbytis frontata	X	VU	0	4096	4096	6096.6	Forest	9.88129	312476	313349	275377	206544	274812	203749	25.8586	26325.9	12.9207	2794.13	142.072	5.08467	273876	197850	0.277593	1.1524	1.21134	-0.058943	2
Prehos	Mammal	CERCOPITHECIDAE	Hose’s Langur	Presbytis hosei	X	VU	0	1600	1600	6277.78	Forest	10.0771	244710	242308	215675	156246	215169	154077	28.3924	23707.9	15.387	2168.69	39.9726	1.84317	213771	147829	0.30847	1.13716	1.1984	-0.0612347	2
Prerub	Mammal	CERCOPITHECIDAE	Maroon Leaf Monkey	Presbytis rubicunda		LC	0	2000	2000	6348.53	Forest	10.153	502565	503071	430230	305991	428932	300458	29.9522	35870.3	11.9386	5533.07	192.408	3.47742	425987	282142	0.337675	1.14516	1.20848	-0.0633169	2
Prilin	Mammal	PRIONODONTIDAE	Banded Linsang	Prionodon linsang		LC	11	2700	2689	684.83	Forest	2.28373	730855	666159	523740	371655	518904	362141	30.2105	52489.1	14.4941	9514.63	508.588	5.34533	490078	314873	0.357504	1.17198	1.21228	-0.0403029	2
Sunhos	Mammal	SORICIDAE	Bornean Pgymy Shrew	Suncus hosei	X	DD	0	800	800	10.2088	Forest	0.136401	12481.7	11607.2	9518.64	7847.45	9477.12	7725.75	18.4799	1176.71	15.231	121.693	1.6047	1.31865	7639.15	6687.71	0.124548	1.127	1.1992	-0.0722062	1
Susbar	Mammal	SUIDAE	Bearded Pig	Sus barbatus		VU	0	4096	4096	135806	Forest	79.0424	533561	534702	479173	350460	477890	344525	27.9069	49765	14.4445	5934.16	286.142	4.82195	456826	325382	0.287733	1.13718	1.20801	-0.0708381	2
Tarban	Mammal	TARSIIDAE	Horsfield’s Tarsier	Tarsius bancanus		VU	0	1200	1200	114.39	Forest	0.688533	730823	712120	536696	360516	533828	351191	34.2127	46775.7	13.3192	9325.33	483.856	5.18862	493719	285196	0.422352	1.1567	1.20999	-0.0532895	3
Tracri	Mammal	CERCOPITHECIDAE	Silvery Lutung	Trachypithecus cristatus		NT	0	4096	4096	7176.81	Forest	11.0225	730854	730723	555107	378676	552261	369388	33.1135	53253.9	14.4168	9288.69	476.84	5.13355	535102	333272	0.37718	1.15694	1.21028	-0.0533403	2
Tranap	Mammal	TRAGULIDAE	Greater Oriental Chevrotain	Tragulus napu		LC	0	1100	1100	5273.67	Forest, plantations, open areas	8.96645	732809	705583	529317	352815	526409	343395	34.7666	44181	12.8659	9419.82	506.14	5.37314	513431	314963	0.386552	1.15678	1.20999	-0.0532085	2
Tupsal	Mammal	TUPAIIDAE	Southern Long-footed Treeshrew	Tupaia salatana	X	LC	0	1000	1000	142	Forest	0.795862	152583	152394	102932	51369.1	102059	48248.5	52.7246	8152.91	16.8977	3120.53	351.283	11.2572	68106.8	15828.5	0.767593	1.16798	1.22384	-0.0558527	4
