# Supplementary material
Source: publisher figshare collection journal article supplement (https://frontiersin.figshare.com/ndownloader/files/22530497)
Supplement: Supplementary file 1 [file 22530497 › Supplementary Table 3.XLSX]

## Sheet: locations_within_range_5loc_R
Taxon	ID	Scientific name	No occurrences reported in GBIF	Total sightings in Borneo	No sightings in original range	No sightings in unique locations	No sightings in unique locations in Borneo	% total sightings in original range	% sighting unique location in original range	% total sightings in range refined by elevation	% sighting unique location in range refined by elevation
Bird	Abrsup	Abroscopus superciliaris	4776	488	449	140	118	92.0082	84.2857	91.3934	82.1429
Bird	Actcon	Actenoides concretus	1326	372	162	81	39	43.5484	48.1481	42.2043	43.2099
Bird	Aegtip	Aegithina tiphia	88308	1602	1416	527	460	88.3895	87.2865	86.8914	83.871
Bird	Aegvir	Aegithina viridissima	4122	1632	1412	292	240	86.5196	82.1918	86.4583	81.8493
Bird	Aettem	Aethopyga temminckii	2815	2246	578	347	164	25.7346	47.2622	25.6456	46.6859
Bird	Alcbru	Alcippe brunneicauda	2633	1452	1039	279	169	71.5565	60.5735	71.2121	59.1398
Bird	Alofin	Alophoixus finschii	1100	304	172	65	31	56.5789	47.6923	56.5789	47.6923
Bird	Alopha	Alophoixus phaeocephalus	3026	1096	1094	207	205	99.8175	99.0338	99.8175	99.0338
Bird	Aloruf	Alophoixus ruficrissus	5305	1341	1280	229	204	95.4512	89.083	94.4817	86.8996
Bird	Alotep	Alophoixus tephrogenys	209	29	6	24	6	20.6897	25	20.6897	25
Bird	Anogal	Anorrhinus galeritus	2867	1763	1761	345	343	99.8866	99.4203	99.7731	98.8406
Bird	Antalb	Anthracoceros albirostris	15588	2422	2310	499	475	95.3757	95.1904	94.6738	92.3848
Bird	Antmal	Anthracoceros malayanus	4335	2694	2645	503	472	98.1811	93.837	86.34	82.9026
Bird	Antrho	Anthreptes rhodolaemus	1331	537	212	145	36	39.4786	24.8276	38.3613	23.4483
Bird	Araaff	Arachnothera affinis	356	25	25	15	15	100	100	20	26.6667
Bird	Arachr	Arachnothera chrysogenys	1504	538	479	144	112	89.0335	77.7778	88.8476	77.0833
Bird	Arahyp	Arachnothera hypogrammica	188	24	23	7	6	95.8333	85.7143	95.8333	85.7143
Bird	Arajul	Arachnothera juliae	381	346	330	72	64	95.3757	88.8889	95.3757	88.8889
Bird	Arbgra	Arborophila graydoni	762	644	227	98	18	35.2484	18.3673	34.9379	17.3469
Bird	Arbhyp	Arborophila hyperythra	996	932	925	125	121	99.2489	96.8	83.7983	67.2
Bird	Argarg	Argusianus argus	2837	1055	1055	177	177	100	100	98.0095	99.435
Bird	Bathar	Batrachostomus harterti	10	5	0	1	0	0	0	0	0
Bird	Batjav	Batrachostomus javensis	937	55	55	13	13	100	100	100	100
Bird	Batste	Batrachostomus stellatus	408	56	30	19	9	53.5714	47.3684	50	36.8421
Bird	Bercom	Berenicornis comatus	1084	577	508	152	132	88.0416	86.8421	82.3224	84.2105
Bird	Blyrub	Blythipicus rubiginosus	2609	1391	983	268	212	70.6686	79.1045	70.6686	79.1045
Bird	Braatr	Brachypodius atriceps	878	30	30	17	17	100	100	100	100
Bird	Bubsum	Bubo sumatranus	839	323	293	108	90	90.7121	83.3333	90.7121	83.3333
Bird	Bucrhi	Buceros rhinoceros	4879	2527	2525	477	475	99.9209	99.5807	99.2481	97.2746
Bird	Calocu	Caloperdix oculeus	314	12	12	9	9	100	100	83.3333	77.7778
Bird	Calful	Caloramphus fuliginosus	2114	1725	1646	345	329	95.4203	95.3623	86.7246	85.2174
Bird	Calhos	Calyptomena hosii	111	85	85	32	32	100	100	49.4118	68.75
Bird	Calvir	Calyptomena viridis	2836	681	681	164	164	100	100	99.7063	99.3902
Bird	Calwhi	Calyptomena whiteheadi	686	613	609	92	88	99.3475	95.6522	79.7716	55.4348
Bird	Capcon	Caprimulgus concretus	64	5	5	4	4	100	100	100	100
Bird	Cenrec	Centropus rectunguis	245	142	141	39	38	99.2958	97.4359	99.2958	97.4359
Bird	Ceyeri	Ceyx erithaca	4827	1526	1520	293	287	99.6068	97.9522	98.9515	96.9283
Bird	Chlemi	Chlorocharis emiliae	912	641	640	99	98	99.844	98.9899	93.9158	76.7677
Bird	Chlcya	Chloropsis cyanopogon	3959	1902	1859	268	244	97.7392	91.0448	97.7392	91.0448
Bird	Chlkin	Chloropsis kinabaluensis	562	549	450	132	94	81.9672	71.2121	81.2386	68.9394
Bird	Chlmol	Chloropsis moluccensis	5821	14	12	9	7	85.7143	77.7778	85.7143	77.7778
Bird	Chlson	Chloropsis sonnerati	386	25	23	15	13	92	86.6667	92	86.6667
Bird	Chrgut	Chrysocolaptes guttacristatus	18259	9	9	5	5	100	100	100	100
Bird	Chrmin	Chrysophlegma miniaceum	4277	508	508	156	156	100	100	94.4882	95.5128
Bird	Cisjef	Cissa jefferyi	30	13	12	13	12	92.3077	92.3077	92.3077	92.3077
Bird	Corlar	Coracina larvata	993	671	665	106	102	99.1058	96.2264	99.1058	96.2264
Bird	Corenc	Corvus enca	6630	3045	3012	535	516	98.9163	96.4486	99.0805	96.4486
Bird	Corsum	Corydon sumatranus	1920	452	452	113	113	100	100	100	100
Bird	Cuclep	Cuculus lepidus	1374	593	572	84	72	96.4587	85.7143	95.7841	80.9524
Bird	Cyaruf	Cyanoderma rufifrons	2014	486	447	99	87	91.9753	87.8788	83.9506	67.6768
Bird	Cymmac	Cymbirhynchus macrorhynchos	4755	1879	1874	422	417	99.7339	98.8152	95.7956	92.1801
Bird	Cyoban	Cyornis banyumas	3649	134	95	59	44	70.8955	74.5763	70.8955	74.5763
Bird	Cyocae	Cyornis caerulatus	342	291	237	73	63	81.4433	86.3014	80.756	83.5616
Bird	Cyooli	Cyornis olivaceus	671	183	18	32	8	9.83607	25	9.83607	25
Bird	Cyorfd	Cyornis ruficauda	249	45	1	29	1	2.22222	3.44828	2.22222	3.44828
Bird	Cyorfg	Cyornis rufigastra	1911	147	88	68	37	59.8639	54.4118	59.8639	54.4118
Bird	Cyosup	Cyornis superbus	602	557	534	109	96	95.8707	88.0734	95.8707	88.0734
Bird	Cyoumb	Cyornis umbratilis	690	364	302	118	95	82.967	80.5085	82.1429	78.8136
Bird	Dencin	Dendrocitta cinerascens	2378	2233	2191	308	286	98.1191	92.8571	98.1191	92.8571
Bird	Dicmon	Dicaeum monticolum	1352	1276	1237	209	183	96.9436	87.5598	96.9436	87.5598
Bird	Dicaen	Dicrurus aeneus	57167	599	435	119	89	72.621	74.7899	72.621	74.7899
Bird	Dichot	Dicrurus hottentottus	26406	1137	1135	176	175	99.8241	99.4318	94.9868	90.9091
Bird	Dicpar	Dicrurus paradiseus	83364	2168	2163	421	417	99.7694	99.0499	99.7232	98.8124
Bird	Dinjav	Dinopium javanense	9776	97	65	56	34	67.0103	60.7143	65.9794	58.9286
Bird	Dinraf	Dinopium rafflesii	554	223	184	75	58	82.5112	77.3333	82.5112	77.3333
Bird	Dryjav	Dryocopus javensis	6044	658	556	151	125	84.4985	82.7815	84.4985	82.7815
Bird	Ducbad	Ducula badia	12355	1005	1004	173	172	99.9005	99.422	98.5075	95.3757
Bird	Erpzan	Erpornis zantholeuca	27212	788	648	162	145	82.2335	89.5062	36.6751	54.321
Bird	Eryarq	Erythropitta arquata	384	375	267	89	73	71.2	82.0225	66.9333	73.0337
Bird	Erygra	Erythropitta granatina	564	67	65	42	40	97.0149	95.2381	94.0299	92.8571
Bird	Eryuss	Erythropitta ussheri	1574	1509	1350	211	192	89.4632	90.9953	80.6494	70.1422
Bird	Eryhyp	Erythrura hyperythra	332	19	18	7	6	94.7368	85.7143	84.2105	71.4286
Bird	Erypra	Erythrura prasina	750	8	8	4	4	100	100	100	100
Bird	Eumruf	Eumyias ruficrissa	2444	1599	1354	183	105	84.6779	57.377	83.8024	55.1913
Bird	Eupmac	Eupetes macrocerus	936	69	7	25	6	10.1449	24	10.1449	24
Bird	Eupeut	Euptilotus eutilotus	153	41	30	17	9	73.1707	52.9412	73.1707	52.9412
Bird	Eurhar	Eurylaimus harterti	4388	1183	1183	210	210	100	100	94.421	90
Bird	Euroch	Eurylaimus ochromalus	7550	3883	3455	639	541	88.9776	84.6635	88.9261	84.3505
Bird	Ficdum	Ficedula dumetoria	753	219	77	72	18	35.1598	25	4.56621	9.72222
Bird	Fichyp	Ficedula hyperythra	6900	993	982	112	102	98.8922	91.0714	97.8852	88.3929
Bird	Ficwes	Ficedula westermanni	8604	1260	1241	160	149	98.4921	93.125	98.4921	93.125
Bird	Geocit	Geokichla citrina	23857	165	149	37	29	90.303	78.3784	89.0909	72.973
Bird	Geoint	Geokichla interpres	113	10	1	5	1	10	20	10	20
Bird	Gersul	Gerygone sulphurea	10382	334	234	128	81	70.0599	63.2812	67.9641	60.9375
Bird	Grarel	Gracula religiosa	9892	33	31	25	23	93.9394	92	3.0303	4
Bird	Haesan	Haematortyx sanguiniceps	1351	1282	1258	151	137	98.1279	90.7285	4.75819	14.5695
Bird	Halcor	Halcyon coromanda	2871	202	203	75	76	100.495	101.333	99.505	98.6667
Bird	Hardia	Harpactes diardii	2017	1034	1012	190	177	97.8723	93.1579	96.9052	90
Bird	Harduv	Harpactes duvaucelii	3349	1357	1304	284	254	96.0943	89.4366	95.3574	88.3803
Bird	Harkas	Harpactes kasumba	1815	860	799	166	144	92.907	86.747	92.907	86.747
Bird	Harore	Harpactes oreskios	3083	116	57	58	34	49.1379	58.6207	42.2414	48.2759
Bird	Harorr	Harpactes orrhophaeus	338	109	79	39	18	72.4771	46.1538	72.4771	46.1538
Bird	Harwhi	Harpactes whiteheadi	596	531	525	73	67	98.8701	91.7808	3.38983	17.8082
Bird	Helsqu	Heleia squamifrons	527	499	347	151	96	69.5391	63.5762	69.5391	63.5762
Bird	Hemsor	Hemicircus sordidus	1567	568	558	122	119	98.2394	97.541	97.3592	96.7213
Bird	Hemhir	Hemipus hirundinaceus	3941	1419	1331	318	282	93.7984	88.6792	93.6575	88.3648
Bird	Hempic	Hemipus picatus	15661	463	461	132	130	99.568	98.4848	99.568	98.4848
Bird	Hemcon	Hemixos connectens	7101	379	355	116	102	93.6675	87.931	77.0449	69.8276
Bird	Hiefug	Hierococcyx fugax	599	175	174	59	58	99.4286	98.3051	98.8571	96.6102
Bird	Hievag	Hierococcyx vagans	427	281	14	74	11	4.98221	14.8649	4.98221	14.8649
Bird	Hydbau	Hydrornis baudii	747	707	628	91	82	88.826	90.1099	88.826	90.1099
Bird	Hydcae	Hydrornis caeruleus	216	145	145	34	34	100	100	100	100
Bird	Hydsch	Hydrornis schwaneri	360	347	347	82	82	100	100	95.6772	87.8049
Bird	Hypazu	Hypothymis azurea	85606	2108	2086	407	396	98.9564	97.2973	98.9089	97.0516
Bird	Ictmal	Ictinaetus malaiensis	16829	462	444	140	124	96.1039	88.5714	32.684	28.5714
Bird	Indarc	Indicator archipelagicus	260	86	79	41	35	91.8605	85.3659	89.5349	82.9268
Bird	Iolcha	Iole charlottae	1210	1140	985	193	149	86.4035	77.2021	85.9649	76.1658
Bird	Irepue	Irena puella	24978	1711	1708	327	324	99.8247	99.0826	99.8247	99.0826
Bird	Ixomal	Ixos malaccensis	2212	860	302	156	77	35.1163	49.359	35.1163	49.359
Bird	Kenstr	Kenopia striata	612	349	245	78	31	70.2006	39.7436	70.2006	39.7436
Bird	Kitmal	Kittacincla malabarica	114	15	13	5	4	86.6667	80	80	60
Bird	Lacmel	Lacedo melanops	3339	466	189	107	59	40.5579	55.1402	40.3433	54.2056
Bird	Lalfim	Lalage fimbriata	1603	567	502	130	97	88.5362	74.6154	88.5362	74.6154
Bird	Lalnig	Lalage nigra	7538	737	449	299	223	60.9227	74.5819	58.616	68.8963
Bird	Lopkie	Lophotriorchis kienerii	3474	418	417	135	134	99.7608	99.2593	99.7608	99.2593
Bird	Lopign	Lophura ignita	1343	522	268	96	37	51.341	38.5417	51.341	38.5417
Bird	Macpti	Macronus ptilosus	2466	891	599	218	114	67.2278	52.2936	67.0034	51.8349
Bird	Malsep	Malacocincla sepiaria	302	30	25	17	14	83.3333	82.3529	83.3333	82.3529
Bird	Malaff	Malacopteron affine	2736	1341	979	225	125	73.0052	55.5556	73.0052	55.5556
Bird	Malalb	Malacopteron albogulare	109	38	14	21	11	36.8421	52.381	36.8421	52.381
Bird	Malcin	Malacopteron cinereum	2864	969	922	185	169	95.1496	91.3514	95.1496	91.3514
Bird	Malmrs	Malacopteron magnirostre	2469	670	656	130	120	97.9104	92.3077	97.9104	92.3077
Bird	Malmnm	Malacopteron magnum	2489	1185	553	199	88	46.6667	44.2211	44.8101	41.206
Bird	Meigra	Meiglyptes grammithorax	3124	1062	1058	215	211	99.6234	98.1395	97.9284	93.9535
Bird	Meituk	Meiglyptes tukki	2104	858	240	201	59	27.972	29.3532	26.3403	27.8607
Bird	Miclat	Microhierax latifrons	742	696	663	143	126	95.2586	88.1119	94.8276	86.014
Bird	Mixbor	Mixornis bornensis	2444	2347	2272	551	505	96.8044	91.6515	95.228	88.0218
Bird	Mulpul	Mulleripicus pulverulentus	3015	362	362	108	108	100	100	99.7238	99.0741
Bird	Napepi	Napothera epilepidota	1161	58	53	26	23	91.3793	88.4615	91.3793	88.4615
Bird	Nisalb	Nisaetus alboniger	1881	580	576	154	151	99.3103	98.0519	72.069	61.039
Bird	Nisnan	Nisaetus nanus	1867	1531	1503	262	242	98.1711	92.3664	98.0405	91.9847
Bird	Nycami	Nyctyornis amictus	3519	814	813	201	200	99.8771	99.5025	98.4029	97.0149
Bird	Orihos	Oriolus hosii	93	83	83	29	29	100	100	68.6747	75.8621
Bird	Orixtt	Oriolus xanthonotus	3972	1369	1105	237	194	80.7159	81.8565	80.6428	81.4346
Bird	Ortatr	Orthotomus atrogularis	15182	1000	982	213	204	98.2	95.7746	98.2	95.7746
Bird	Ortser	Orthotomus sericeus	6924	2939	2514	618	499	85.5393	80.7443	85.4372	80.0971
Bird	Oturuf	Otus rufescens	355	152	31	56	14	20.3947	25	20.3947	25
Bird	Otuspi	Otus spilocephalus	6660	248	237	48	42	95.5645	87.5	95.5645	87.5
Bird	Paccin	Pachycephala cinerea	2101	111	63	58	34	56.7568	58.6207	56.7568	58.6207
Bird	Pachyp	Pachycephala hypoxantha	2010	1843	1802	209	189	97.7754	90.4306	97.7754	90.4306
Bird	Perign	Pericrocotus igneus	1651	716	698	136	128	97.486	94.1176	97.3464	93.3824
Bird	Permon	Pericrocotus montanus	29191	1394	1379	178	174	98.924	97.7528	98.924	97.7528
Bird	Phadia	Phaenicophaeus diardi	1725	401	353	126	97	88.0299	76.9841	88.0299	76.9841
Bird	Phasum	Phaenicophaeus sumatranus	1600	207	195	96	86	94.2029	89.5833	93.7198	88.5417
Bird	Phipyr	Philentoma pyrhoptera	2592	840	823	181	167	97.9762	92.2652	96.7857	89.5028
Bird	Phivel	Philentoma velata	1009	565	462	144	111	81.7699	77.0833	81.5929	76.3889
Bird	Phymon	Phylloscopus montis	65	5	5	3	3	100	100	100	100
Bird	Phytri	Phylloscopus trivirgatus	4596	1692	1683	190	182	99.4681	95.7895	99.2317	94.7368
Bird	Picinn	Picumnus innominatus	4845	11	3	9	2	27.2727	22.2222	27.2727	22.2222
Bird	Picpun	Picus puniceus	2741	527	526	141	140	99.8102	99.2908	81.0247	81.5603
Bird	Pitsor	Pitta sordida	3801	783	721	170	155	92.0817	91.1765	91.3155	90
Bird	Pitgym	Pityriasis gymnocephala	663	556	555	94	93	99.8201	98.9362	99.1007	96.8085
Bird	Plagal	Platylophus galericulatus	1691	675	675	122	122	100	100	93.9259	93.4426
Bird	Pommon	Pomatorhinus montanus	2249	820	819	196	195	99.878	99.4898	99.7561	98.9796
Bird	Psadal	Psarisomus dalhousiae	3968	122	102	38	30	83.6066	78.9474	81.9672	73.6842
Bird	Psichr	Psilopogon chrysopogon	2959	40	27	20	15	67.5	75	30	35
Bird	Psiduv	Psilopogon duvaucelii	10381	3029	2750	551	481	90.789	87.2958	90.756	87.2958
Bird	Psiexi	Psilopogon eximius	613	596	544	162	140	91.2752	86.4198	54.1946	61.7284
Bird	Psihen	Psilopogon henricii	1984	761	420	123	49	55.1905	39.8374	15.9001	14.6341
Bird	Psimon	Psilopogon monticola	925	903	138	185	53	15.2824	28.6486	4.87265	9.18919
Bird	Psimys	Psilopogon mystacophanos	3904	1482	1366	279	237	92.1727	84.9462	91.498	83.1541
Bird	Psipul	Psilopogon pulcherrimus	1994	1906	1676	242	175	87.9328	72.314	86.149	66.1157
Bird	Psiraf	Psilopogon rafflesii	2494	546	112	174	64	20.5128	36.7816	20.5128	36.7816
Bird	Psilon	Psittacula longicauda	6283	1291	1112	323	278	86.1348	86.0681	85.67	84.2105
Bird	Pteaer	Pteruthius aeralatus	5368	1058	1048	160	155	99.0548	96.875	99.0548	96.875
Bird	Ptileu	Ptilocichla leucogrammica	277	238	232	43	37	97.479	86.0465	97.479	86.0465
Bird	Pycbru	Pycnonotus brunneus	8845	2971	2622	555	458	88.2531	82.5225	88.3877	82.8829
Bird	Pyccya	Pycnonotus cyaniventris	115	12	6	9	4	50	44.4444	50	44.4444
Bird	Pycery	Pycnonotus erythropthalmos	326	79	72	33	30	91.1392	90.9091	91.1392	90.9091
Bird	Pycleu	Pycnonotus leucops	5262	448	416	95	72	92.8571	75.7895	90.4018	70.5263
Bird	Pycmon	Pycnonotus montis	10	10	10	6	6	100	100	100	100
Bird	Pycsim	Pycnonotus simplex	5143	1536	1343	350	304	87.4349	86.8571	87.3698	86.5714
Bird	Pycsqu	Pycnonotus squamatus	64	8	1	7	1	12.5	14.2857	12.5	14.2857
Bird	Rhaleu	Rhaphidura leucopygialis	3747	1701	1473	245	197	86.5961	80.4082	86.5961	80.4082
Bird	Rhivig	Rhinoplax vigil	88	11	11	9	9	100	100	100	100
Bird	Rhialb	Rhipidura albicollis	20263	2009	23	295	14	1.14485	4.74576	1.14485	4.74576
Bird	Rhiper	Rhipidura perlata	1560	920	899	188	176	97.7174	93.617	97.6087	93.0851
Bird	Rhilon	Rhizothera longirostris	62	13	13	7	7	100	100	100	100
Bird	Rhyund	Rhyticeros undulatus	4565	1036	1034	248	246	99.8069	99.1935	99.7104	98.7903
Bird	Rolrou	Rollulus rouloul	824	115	115	50	50	100	100	89.5652	82
Bird	Sasabn	Sasia abnormis	1977	991	986	214	211	99.4955	98.5981	98.7891	97.6636
Bird	Sitfro	Sitta frontalis	22306	989	984	209	204	99.4944	97.6077	99.4944	97.6077
Bird	Spikin	Spilornis kinabaluensis	347	341	318	103	91	93.2551	88.3495	63.3431	37.8641
Bird	Staleu	Stachyris leucotis	259	73	29	20	8	39.726	40	39.726	40
Bird	Stamac	Stachyris maculata	2586	1078	509	231	89	47.2171	38.5281	47.2171	38.5281
Bird	Stanps	Stachyris nigriceps	6544	1677	1601	207	193	95.4681	93.2367	95.4681	93.2367
Bird	Stanll	Stachyris nigricollis	1323	406	93	133	23	22.9064	17.2932	22.9064	17.2932
Bird	Stapol	Stachyris poliocephala	1487	447	410	104	86	91.7226	82.6923	91.7226	82.6923
Bird	Tepvir	Tephrodornis virgatus	5476	462	405	106	77	87.6623	72.6415	87.6623	72.6415
Bird	Teraff	Terpsiphone affinis	3414	982	975	207	201	99.2872	97.1014	99.2872	97.1014
Bird	Todchl	Todiramphus chloris	40886	2036	1601	733	594	78.6346	81.0368	76.0806	75.7162
Bird	Trecap	Treron capellei	878	216	204	72	66	94.4444	91.6667	93.9815	90.2778
Bird	Tripgn	Trichastoma pyrrogenys	766	700	687	105	101	98.1429	96.1905	30.2857	56.1905
Bird	Triros	Trichastoma rostratum	162	49	49	27	27	100	100	93.8776	96.2963
Bird	Trippu	Trichixos pyrropygus	784	387	363	104	97	93.7984	93.2692	91.9897	87.5
Bird	Tricri	Tricholestes criniger	4479	1390	1140	249	199	82.0144	79.9197	82.0144	79.9197
Bird	Turatr	Turdinus atrigularis	273	258	239	52	38	92.6357	73.0769	91.4729	71.1538
Bird	Turcra	Turdinus crassus	607	575	562	68	56	97.7391	82.3529	97.7391	82.3529
Bird	Turpol	Turdus poliocephalus	4195	64	62	17	15	96.875	88.2353	96.875	88.2353
Bird	Yuheve	Yuhina everetti	2812	2643	2569	399	367	97.2002	91.9799	97.2002	91.9799
Bird	Zosatr	Zosterops atricapilla	1964	1687	1204	188	95	71.3693	50.5319	59.1583	27.1277
Bird	Zoseve	Zosterops everetti	3427	182	60	79	23	32.967	29.1139	32.967	29.1139
Mammal	Arctri	Arctogalidia trivirgata	198	13	13	9	9	100	100	100	100
Mammal	Helmal	Helarctos malayanus	184	8	5	8	5	62.5	62.5	62.5	62.5
Mammal	Hemder	Hemigalus derbyanus	107	12	12	11	11	100	100	100	100
Mammal	Hylalb	Hylobates albibarbis	33	22	21	11	10	95.4545	90.9091	95.4545	90.9091
Mammal	Naslar	Nasalis larvatus	446	198	192	143	137	96.9697	95.8042	95.4545	93.7063
Mammal	Ponpyg	Pongo pygmaeus	675	285	226	128	70	79.2982	54.6875	75.0877	47.6562
Mammal	Prerub	Presbytis rubicunda	292	80	79	48	47	98.75	97.9167	98.75	97.9167
Mammal	Susbar	Sus barbatus	348	52	39	52	39	75	75	75	75
Mammal	Tarban	Tarsius bancanus	14	13	13	13	13	100	100	100	100
Mammal	Tracri	Trachypithecus cristatus	479	46	44	45	43	95.6522	95.5556	91.3043	91.1111
								82.2812	79.1667	76.9561	73.2913
